# Supplementary material for: Divergence in alternative polyadenylation contributes to gene regulatory differences between humans and chimpanzees
Source: eLife journal article supplement (doi:10.7554/elife.62548), 2021-02-17

PC2: 13.1% variance explained

A Top two PCs for PAS usage

● Chimpanzee ● Human

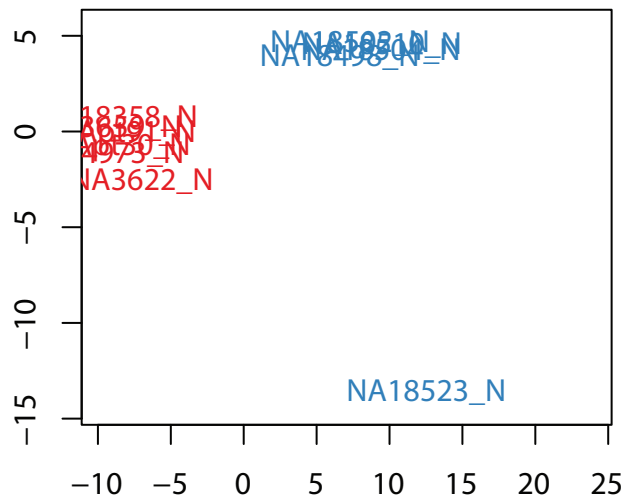

PC1: 41.8% variance explained

B

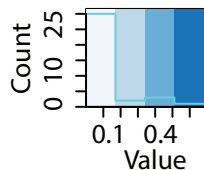

Correlation between PCs and technical factors

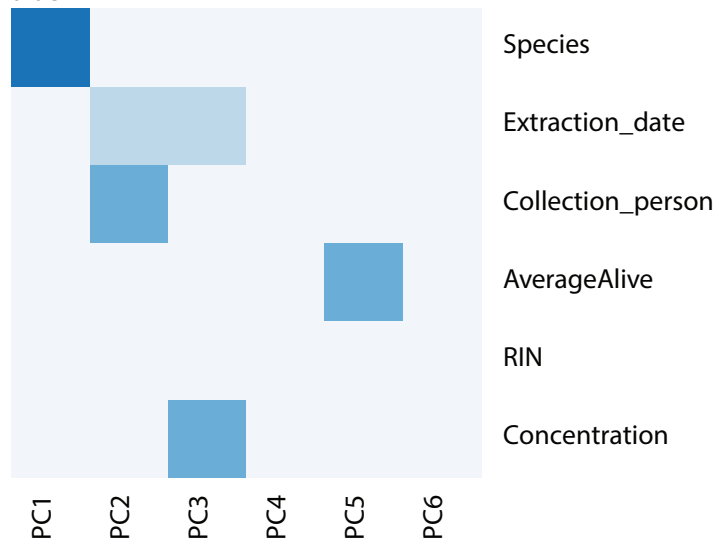

Supplement: supp [file elife-62548-supp-v1.zip]
