# Supplementary material for: Divergence in alternative polyadenylation contributes to gene regulatory differences between humans and chimpanzees
Source: eLife journal article supplement (doi:10.7554/elife.62548), 2021-02-17
Supplement: supp [file elife-62548-supp-v1.zip]

**A**

### Shannon Index to measure isoform diversity

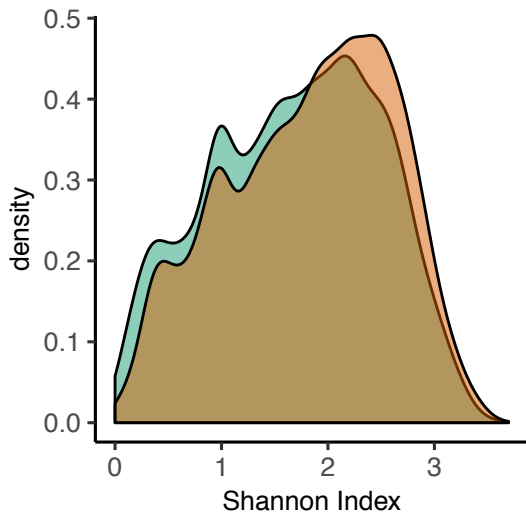

Species

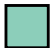

Chimpanzee

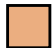

Human

**B**

### Simpson Index to measure isoform diversity

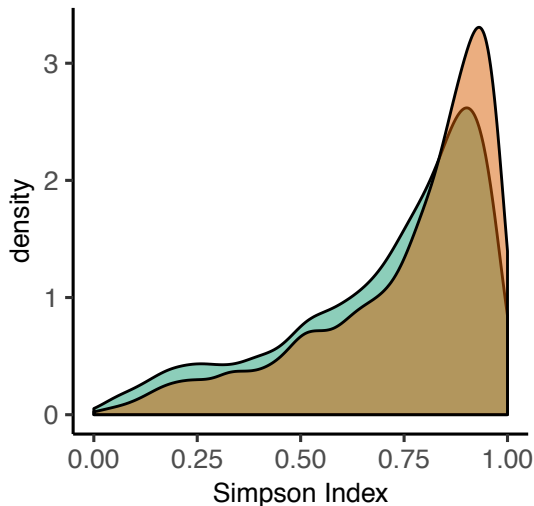

Species

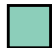

Chimpanzee

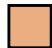

Human
