# Supplementary material for: Divergence in alternative polyadenylation contributes to gene regulatory differences between humans and chimpanzees
Source: eLife journal article supplement (doi:10.7554/elife.62548), 2021-02-17

**A** Enrichment for DE and different dominant  
Remove 353 unlifted

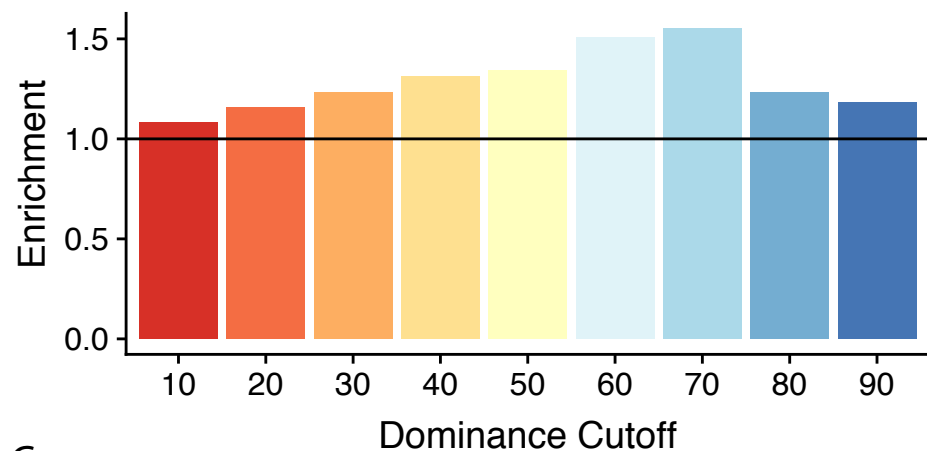

**B** Enrichment for DE and same dominant  
Remove 353 unlifted

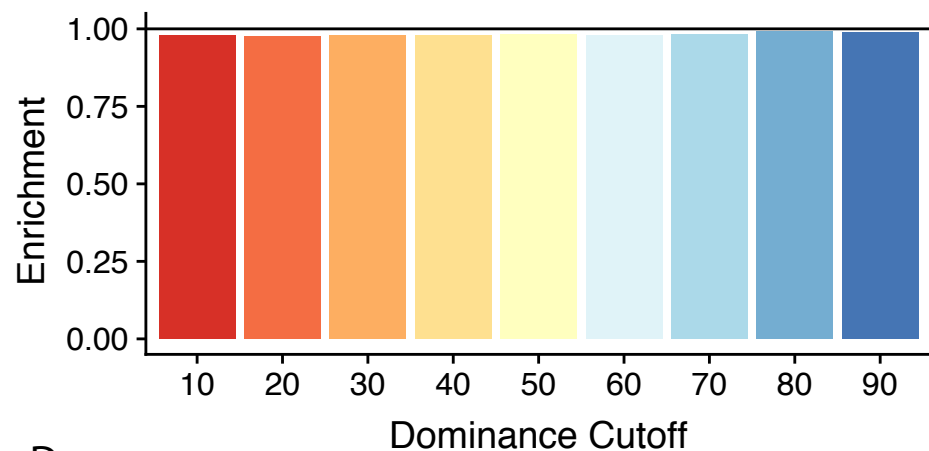

**C** Enrichment pvalues for DE and different dominant  
Remove 353 unlifted

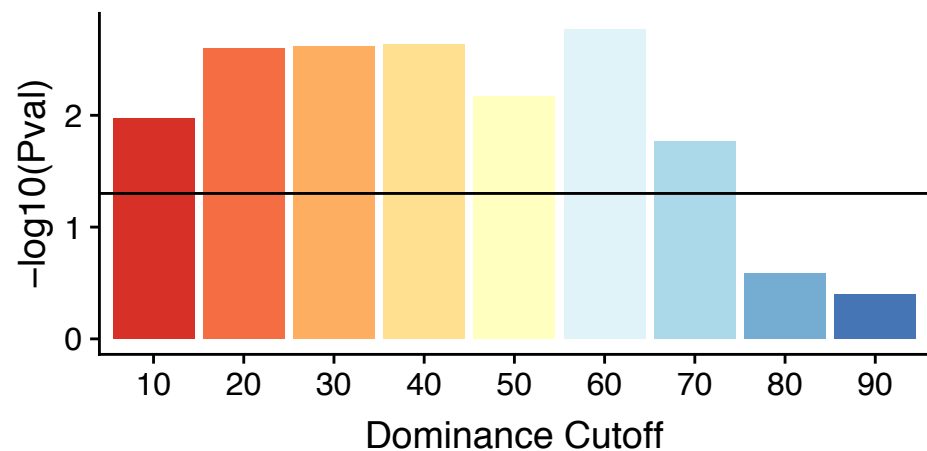

**D** Enrichment pvalues for DE and same dominant  
Remove 353 unlifted

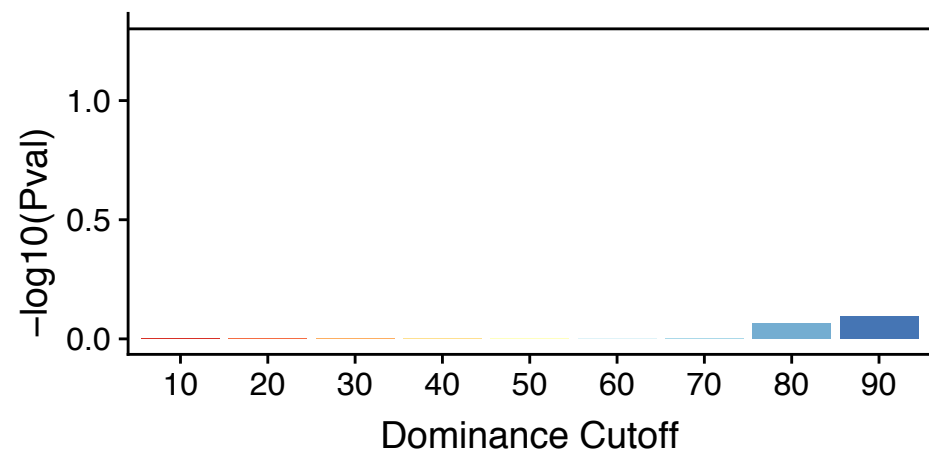

Supplement: supp [file elife-62548-supp-v1.zip]
