# Supplementary material for: Divergence in alternative polyadenylation contributes to gene regulatory differences between humans and chimpanzees
Source: eLife journal article supplement (doi:10.7554/elife.62548), 2021-02-17

**A**

APA v DE  
Remove 353 unlifted

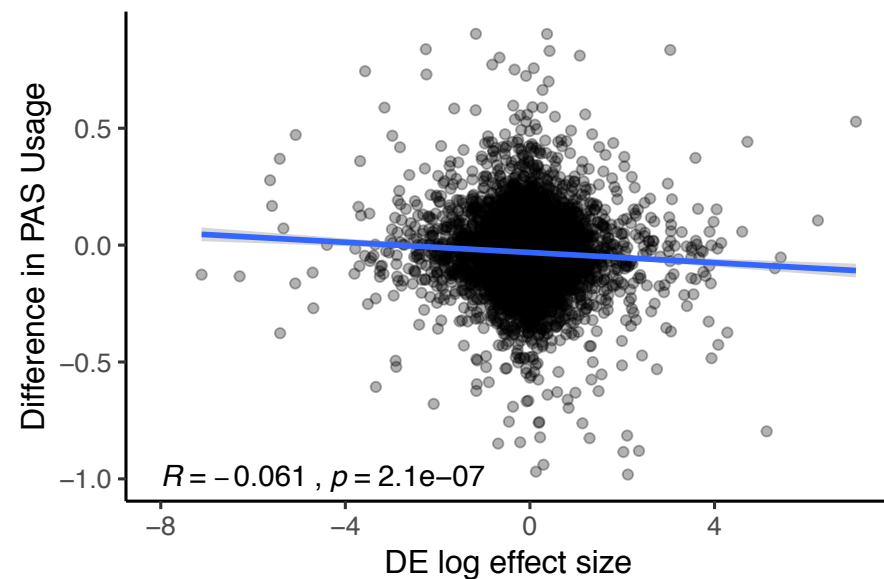**B**

APA v DE  
Remove 353 unlifted

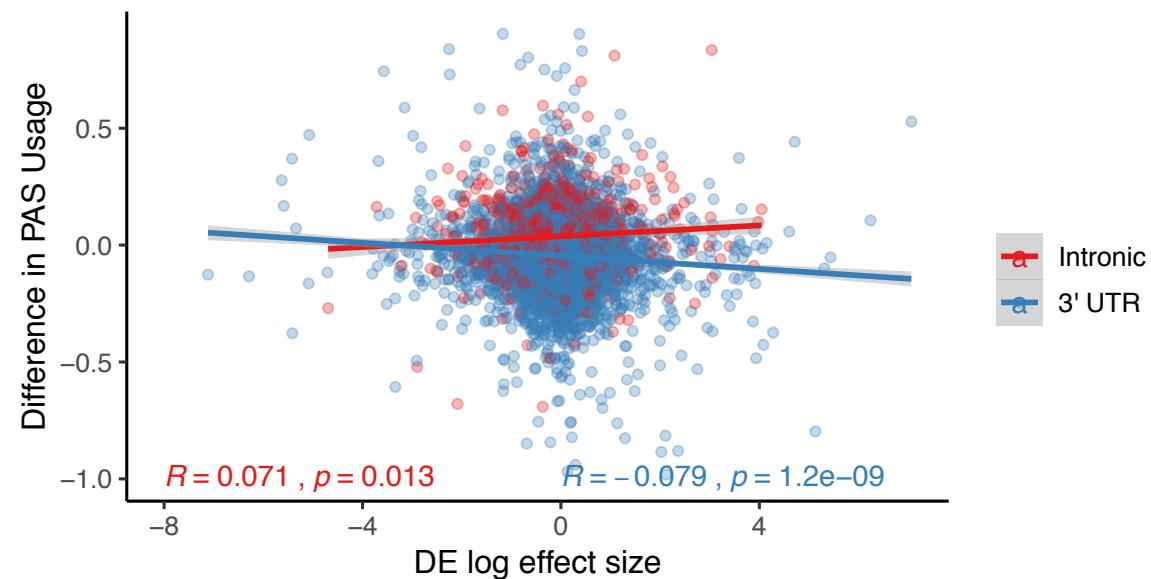**C**

Significant differences in APA and expression  
Remove 353 unlifted

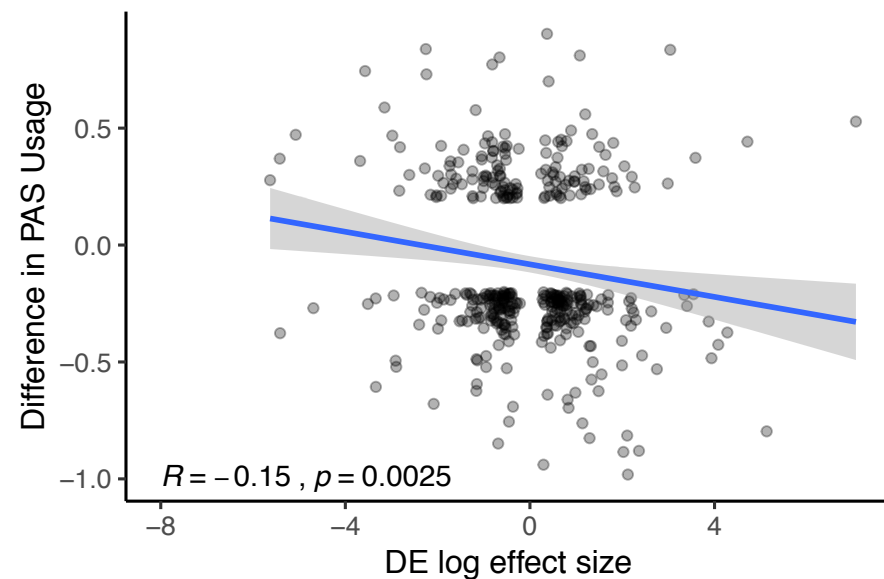**D**

Significant differences in APA and expression  
Remove 353 unlifted

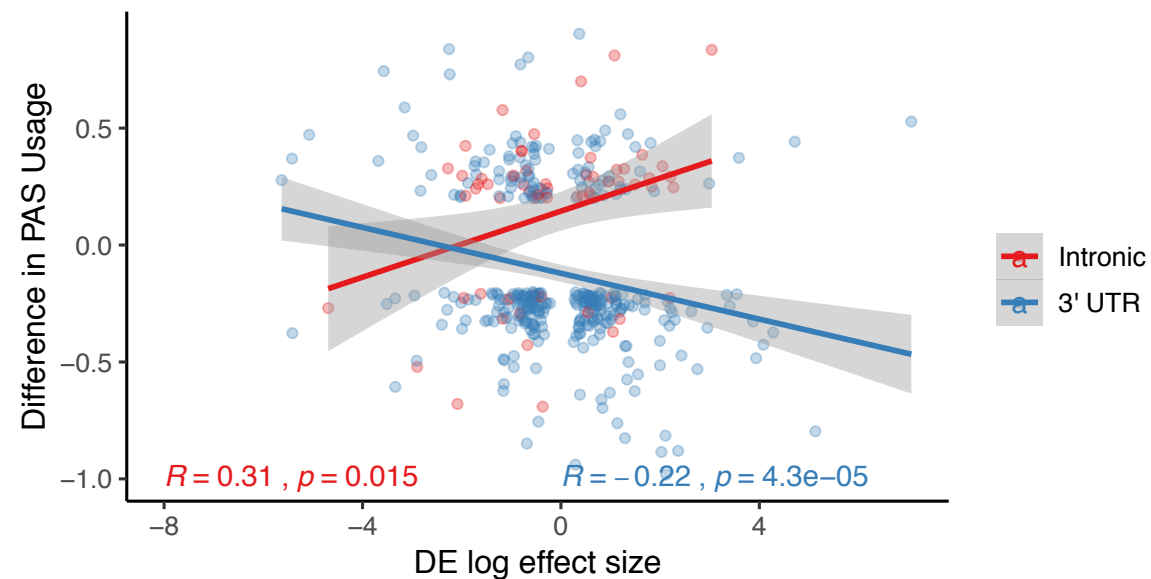

Supplement: supp [file elife-62548-supp-v1.zip]
