# Supplementary material for: Divergence in alternative polyadenylation contributes to gene regulatory differences between humans and chimpanzees
Source: eLife journal article supplement (doi:10.7554/elife.62548), 2021-02-17

**A**

### Negative correlation between expression and PAS number

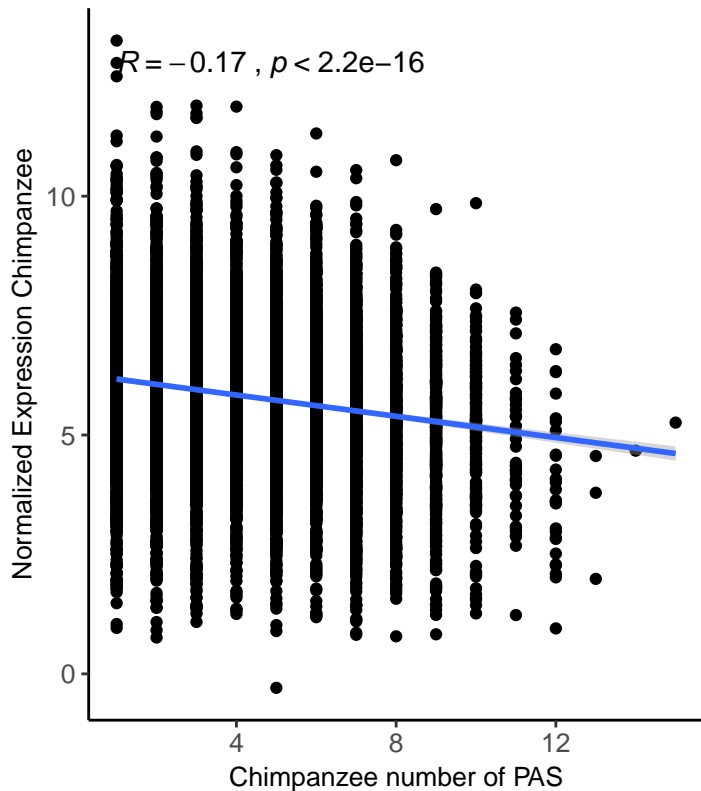**B**

### Negative correlation between expression and PAS number

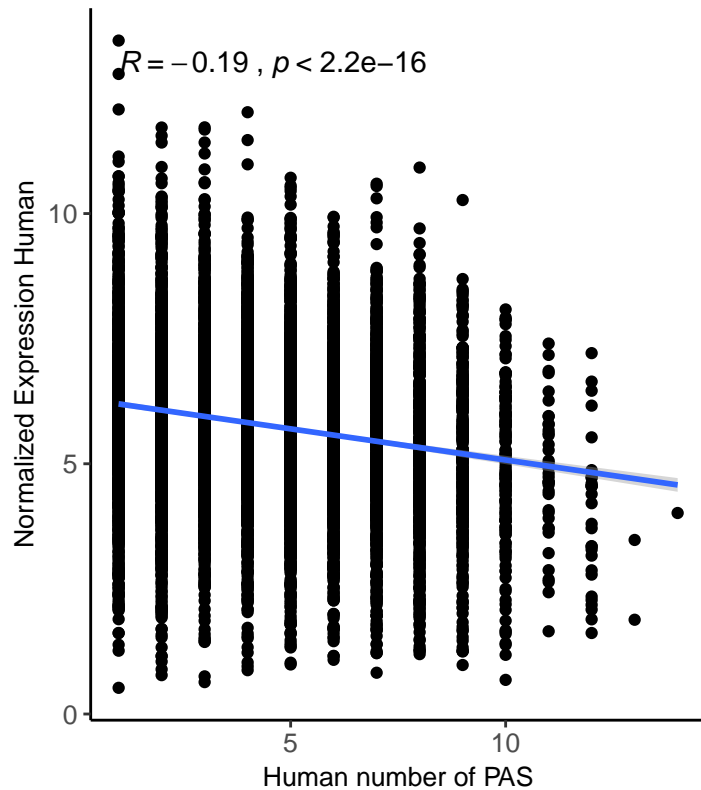

Supplement: supp [file elife-62548-supp-v1.zip]
