# Supplementary material for: Divergence in alternative polyadenylation contributes to gene regulatory differences between humans and chimpanzees
Source: eLife journal article supplement (doi:10.7554/elife.62548), 2021-02-17
Supplement: supp [file elife-62548-supp-v1.zip]

Call PAS in Human  
N=340,023

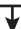

Lift human PAS  
to pantro6  
N=333,741

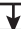

Lift human PAS back to  
hg38  
N=329,946

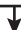

Filter human PAS lifting  
back to same location  
N=327,440

Call PAS in chimpanzee  
N=303,249

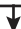

Lift chimpanzee PAS to  
hg38  
N=298,671

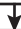

Lift chimpanzee PAS  
back to pantro6  
N=295,067

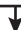

Filter chimpanzee PAS  
lifting back to same  
location  
N=293,398



Lift all PAS to hg38 and merge  
regions overlapping 125 bases  
N=445,944
