# Supplementary figures and images for: Divergence in alternative polyadenylation contributes to gene regulatory differences between humans and chimpanzees
Source: eLife journal article supplement (doi:10.7554/elife.62548), 2021-02-17

A

**Enrichment for APA phenotype differences in other regulatory phenotypes**  
**Remove 353 unlifted**

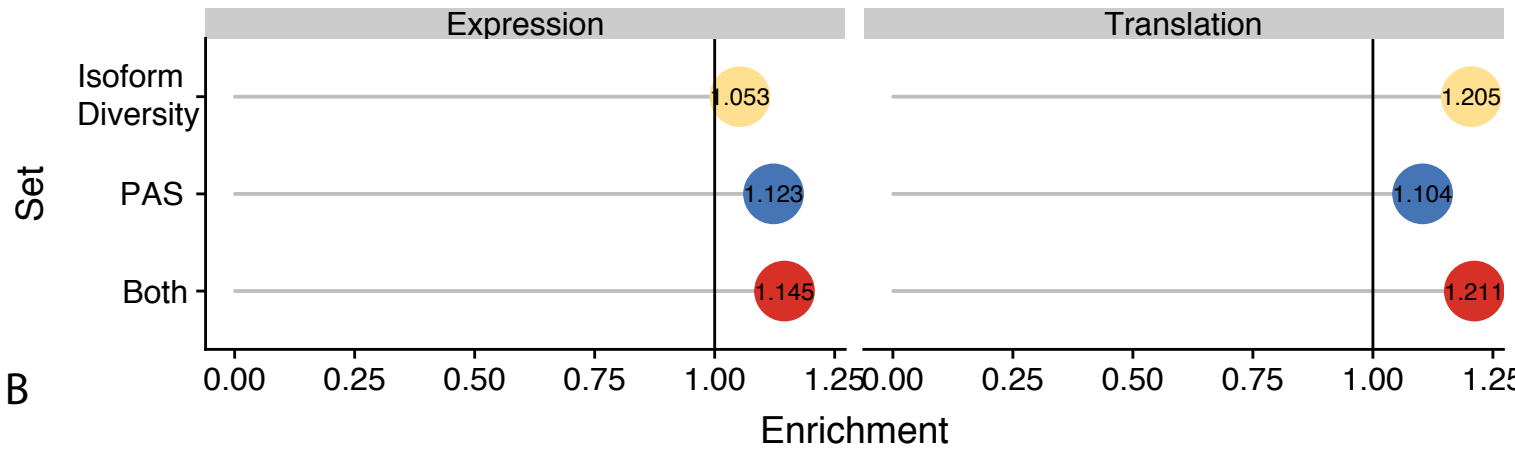

B

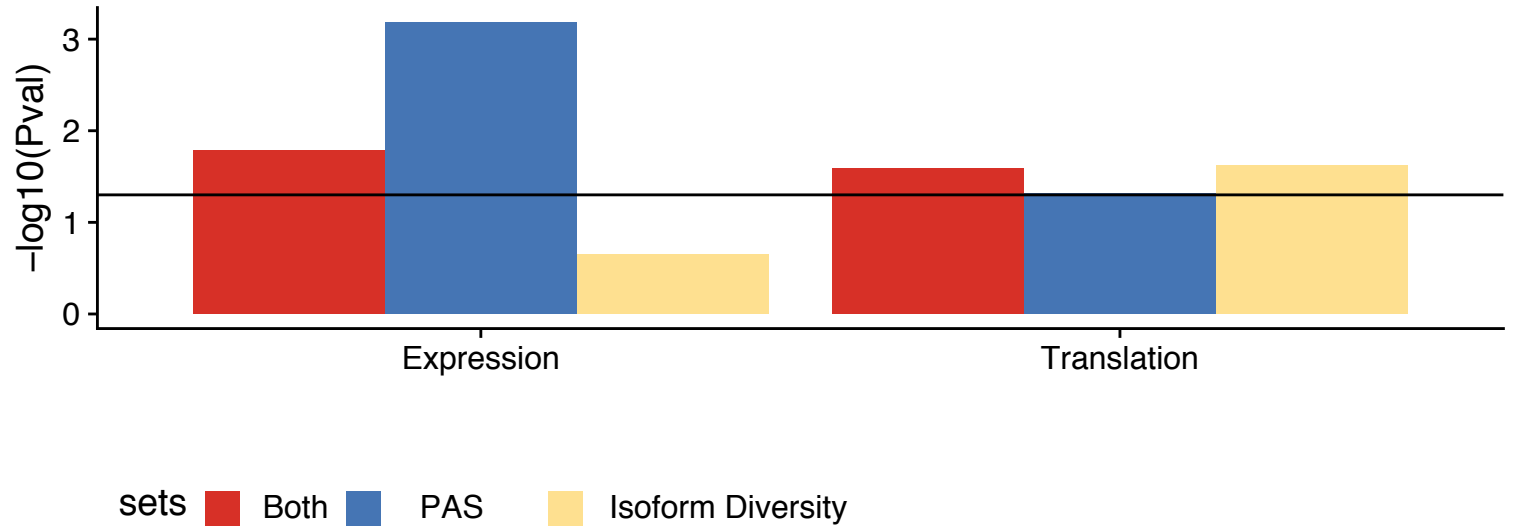

Supplement: supp [file elife-62548-supp-v1.zip]

# Difference in number of PAS at 5% Human vs Chimpanzee

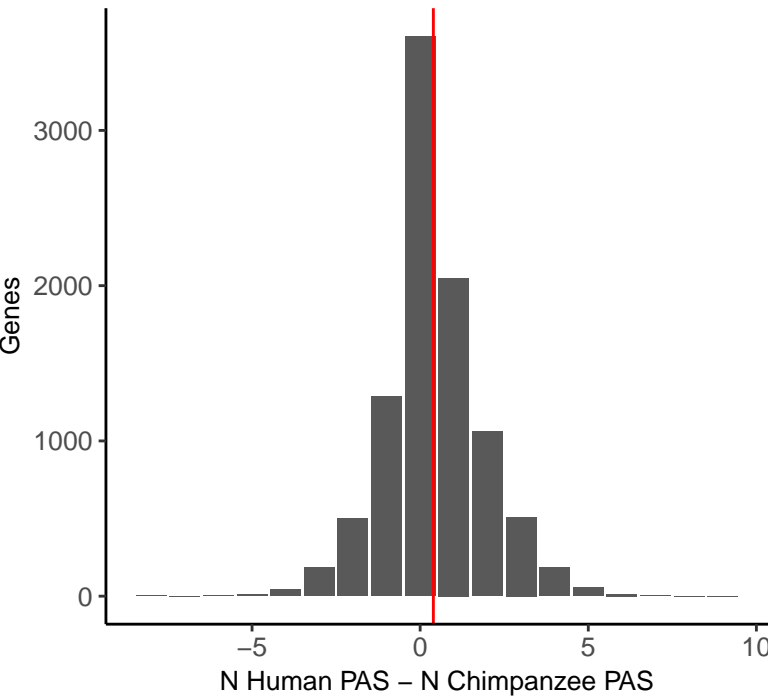

Supplement: supp [file elife-62548-supp-v1.zip]

# Expression independent PAS locations

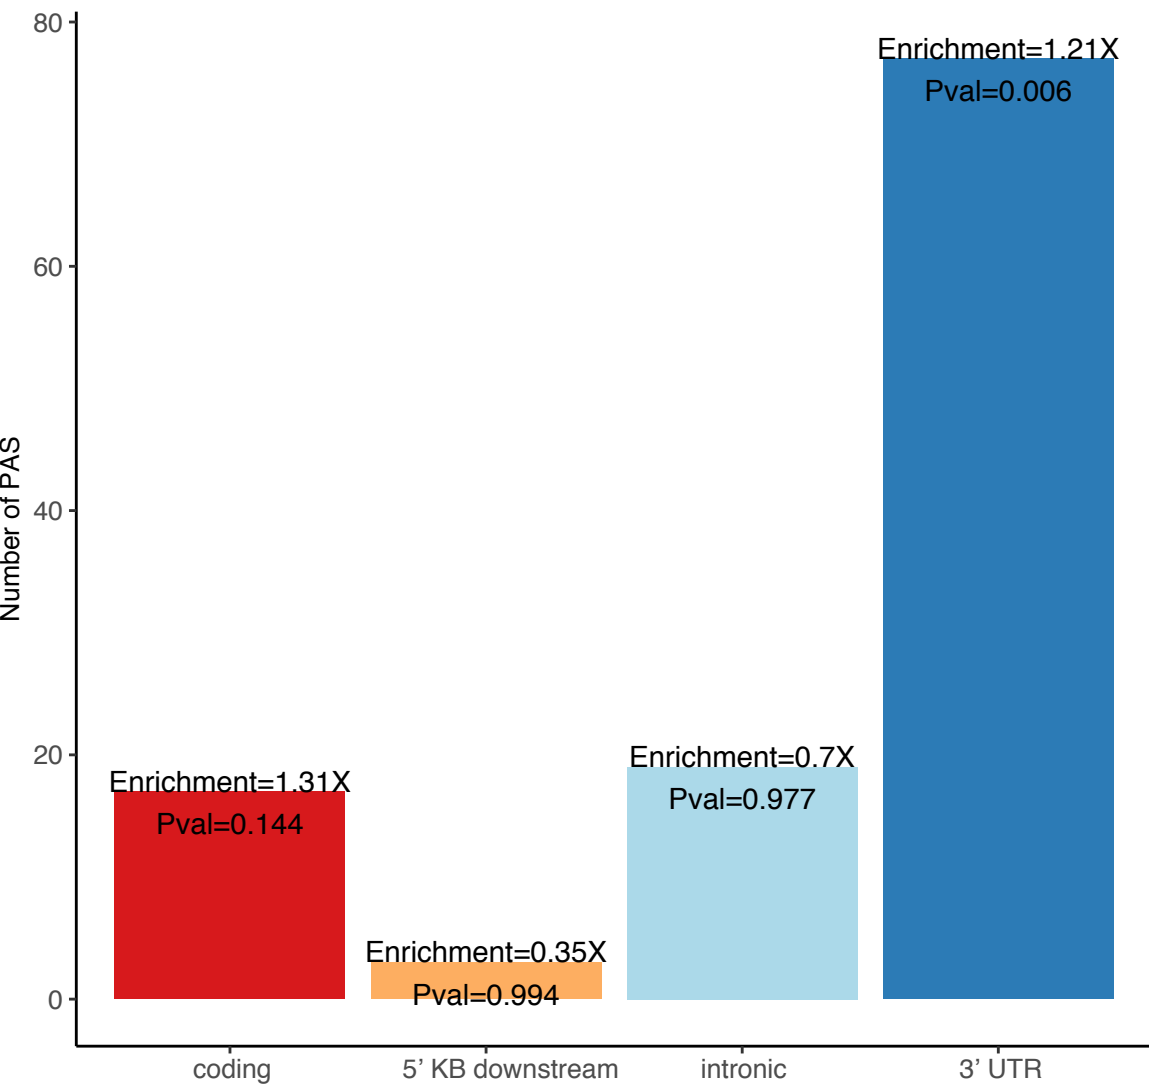

Supplement: supp [file elife-62548-supp-v1.zip]

A

Usage correlation for All PAS

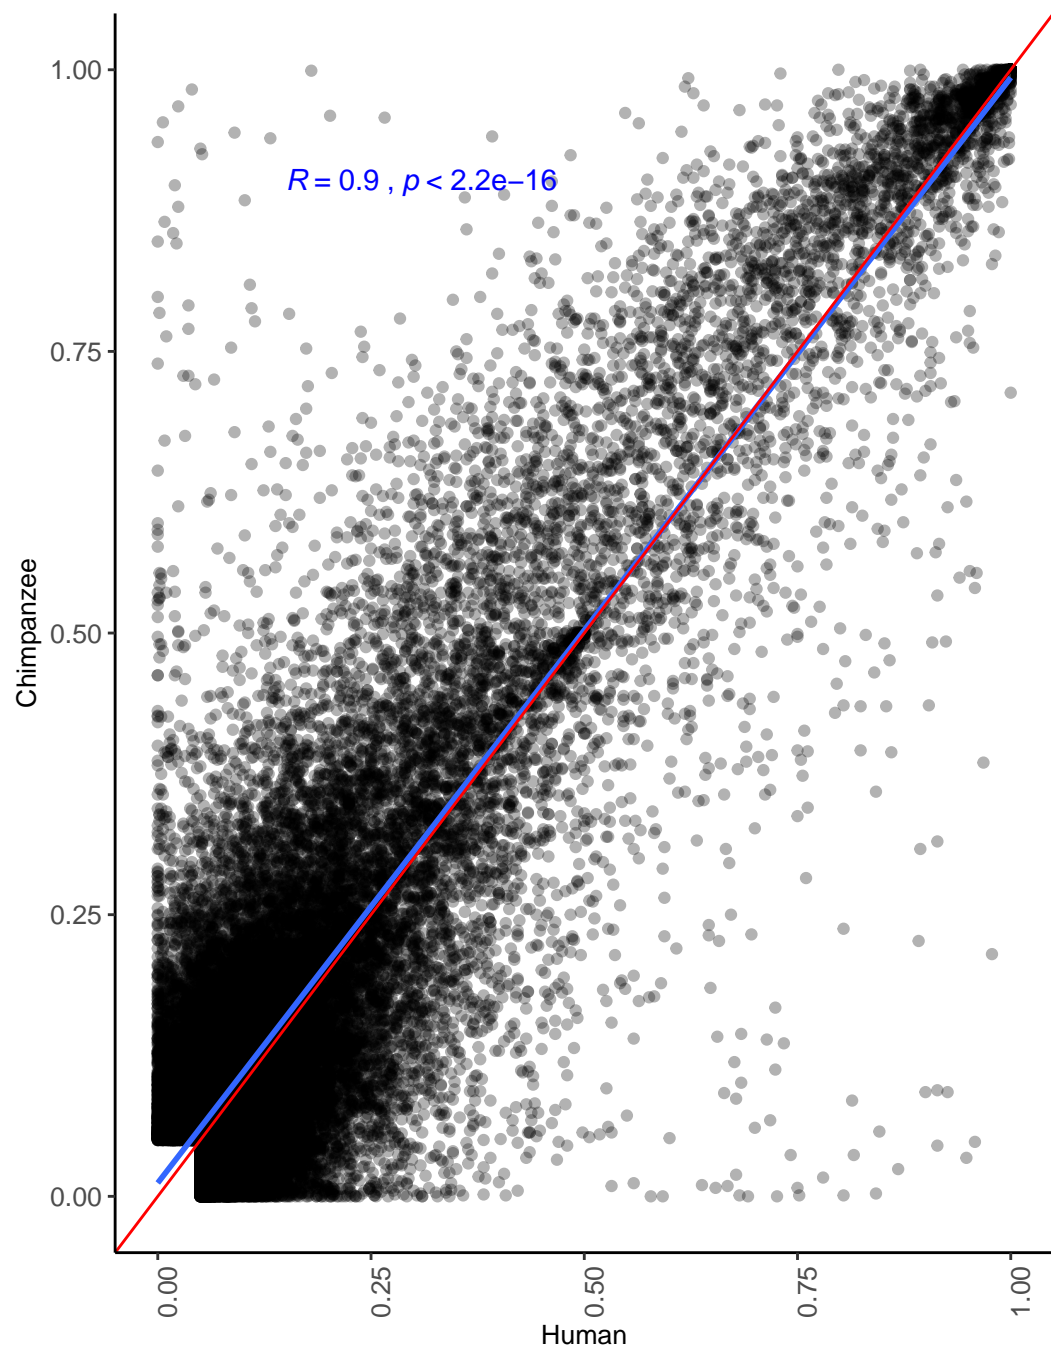

B

Pairwise usage correlation

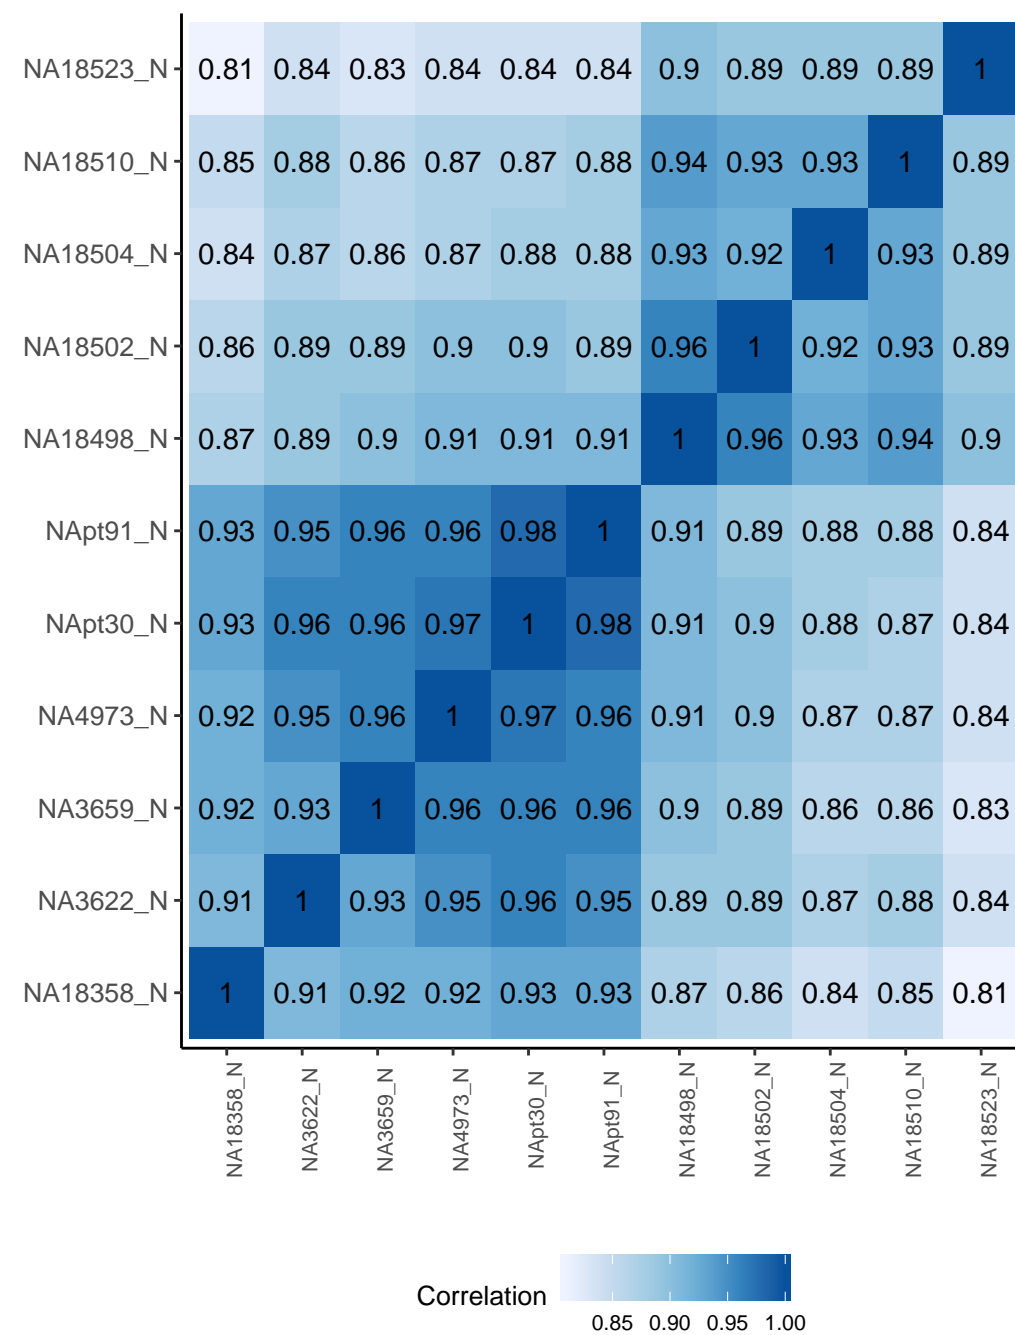

Supplement: supp [file elife-62548-supp-v1.zip]

# Shannon Information Content and PAS number

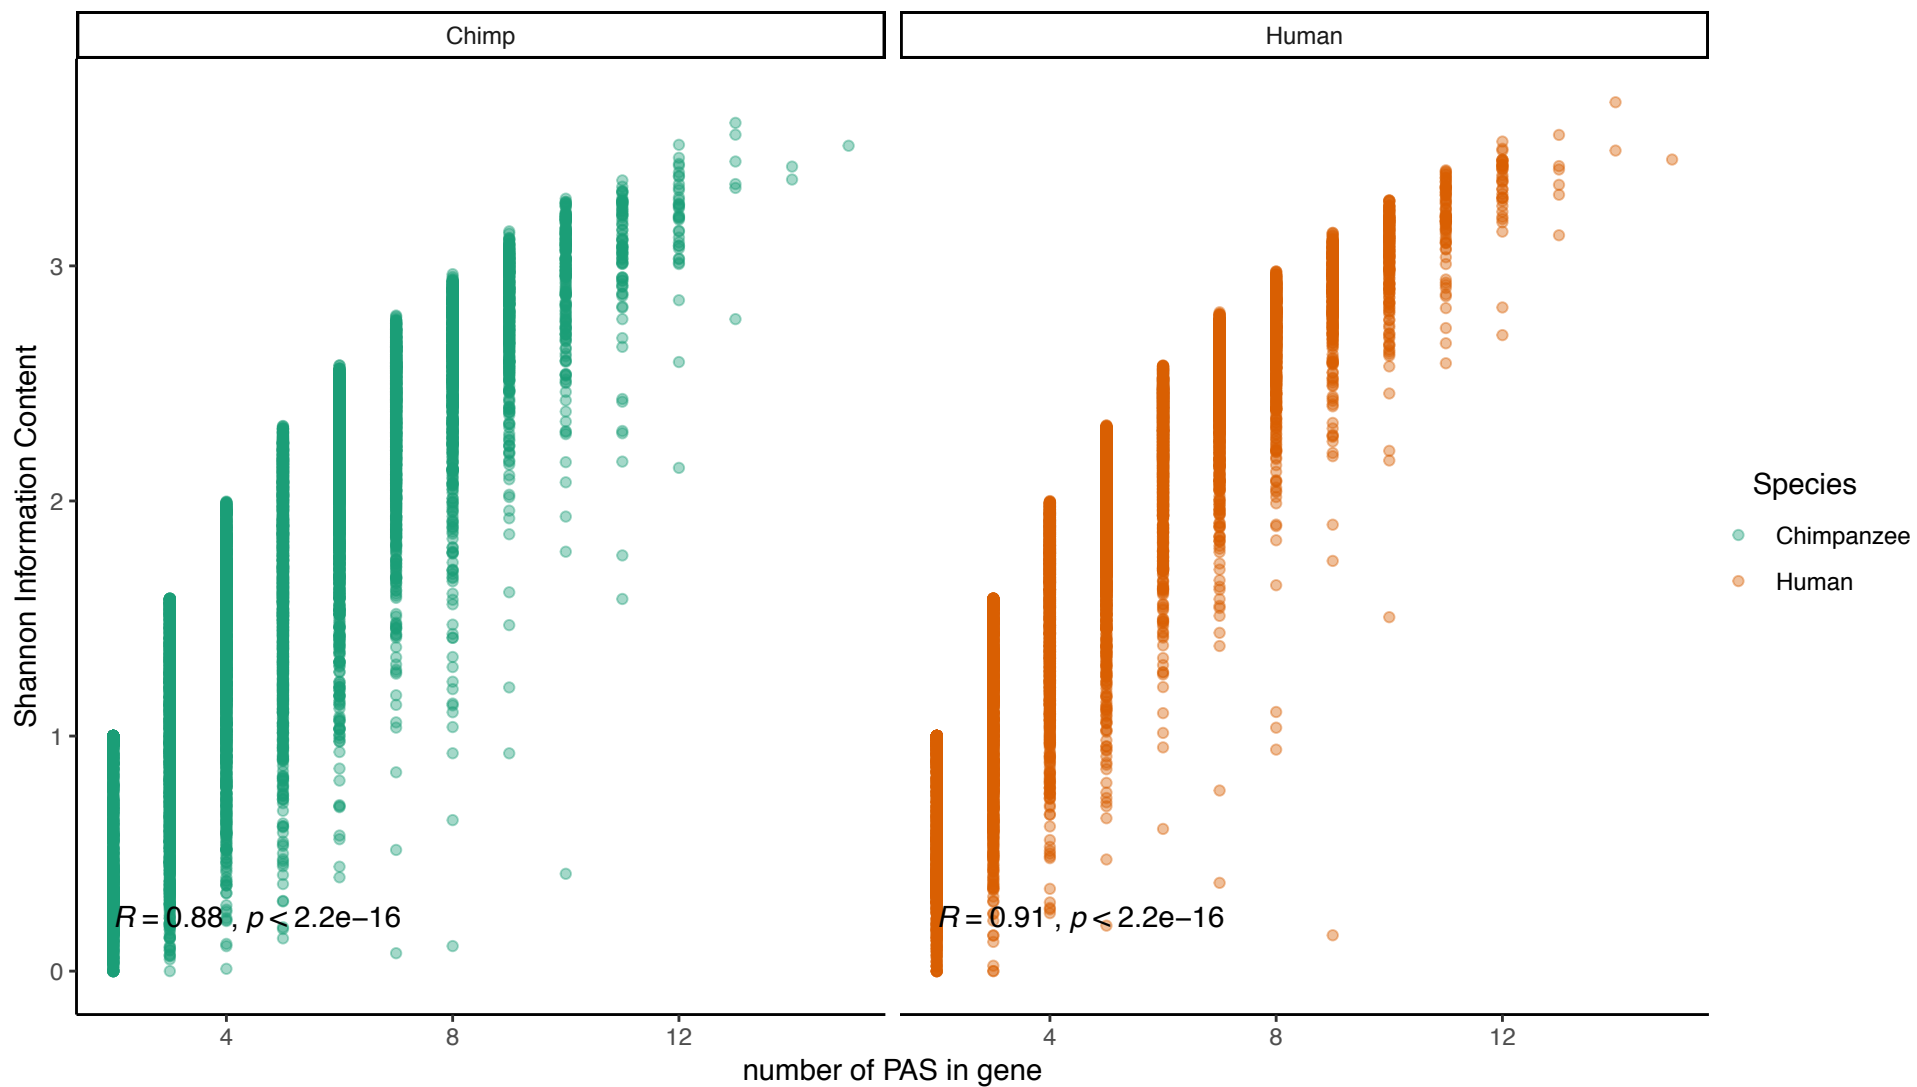

Supplement: supp [file elife-62548-supp-v1.zip]

A

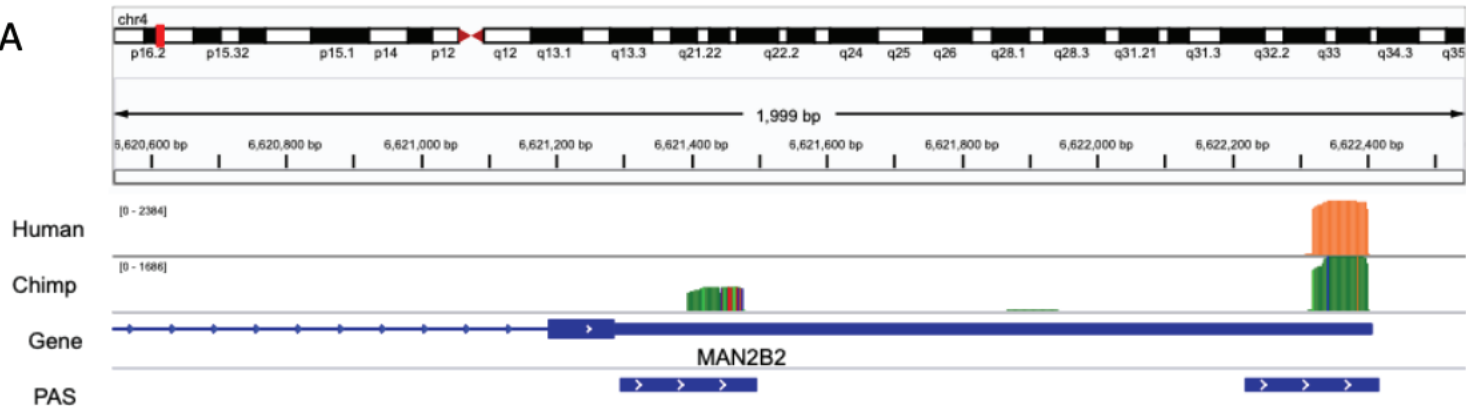

B

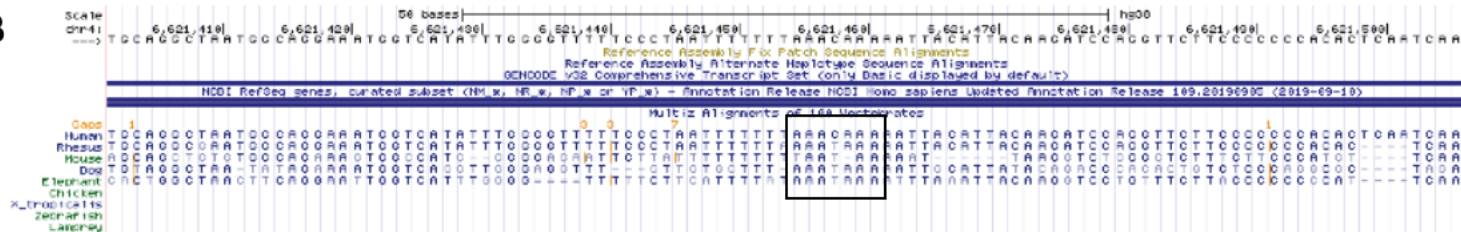

Supplement: supp [file elife-62548-supp-v1.zip]

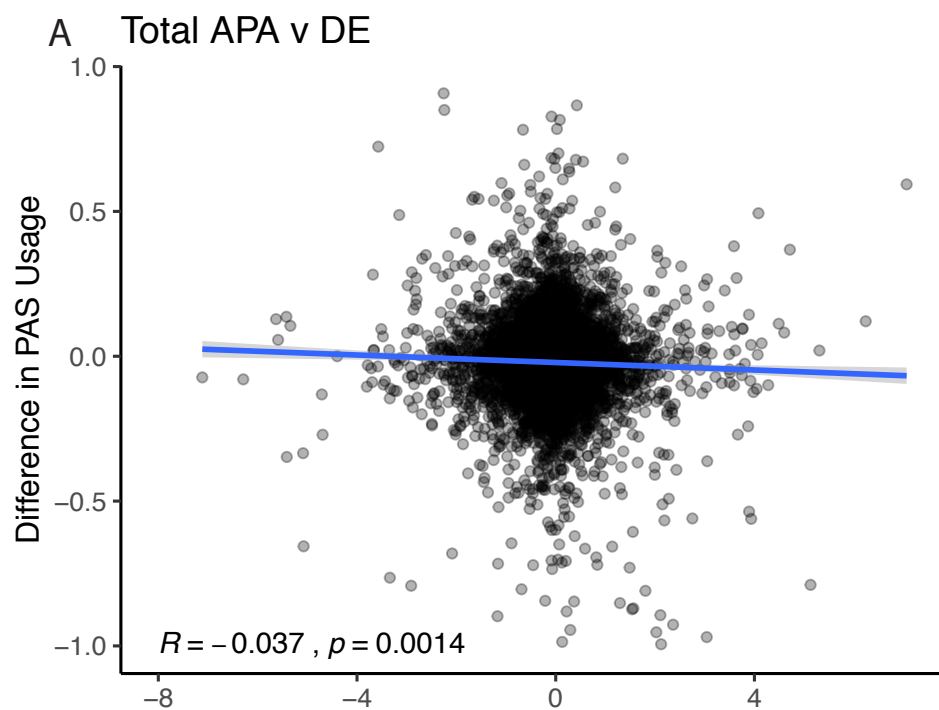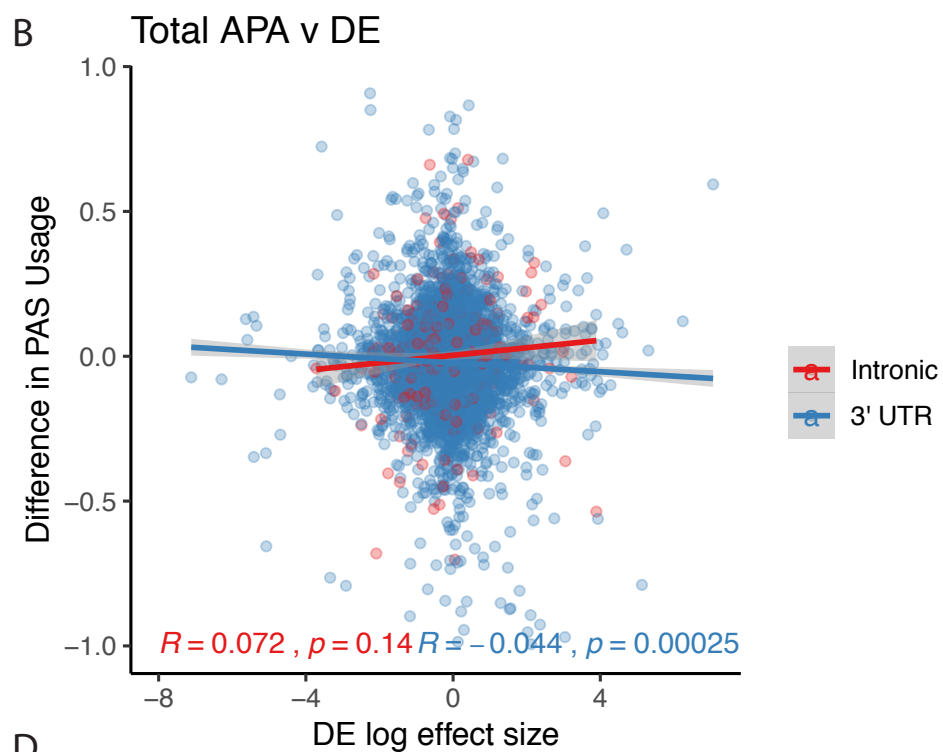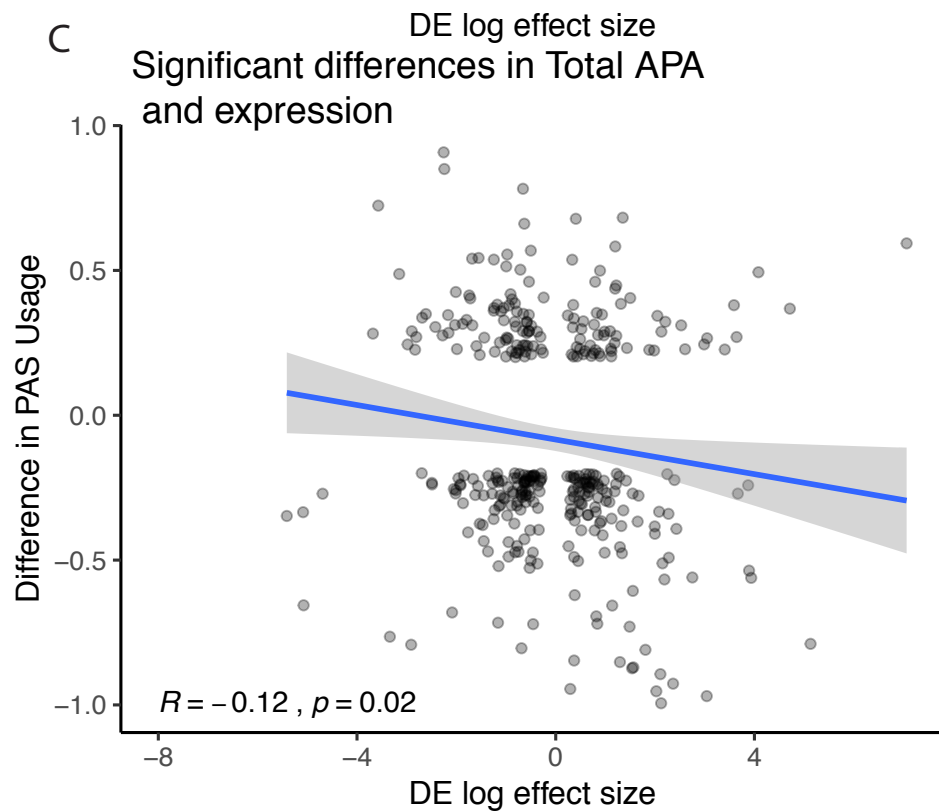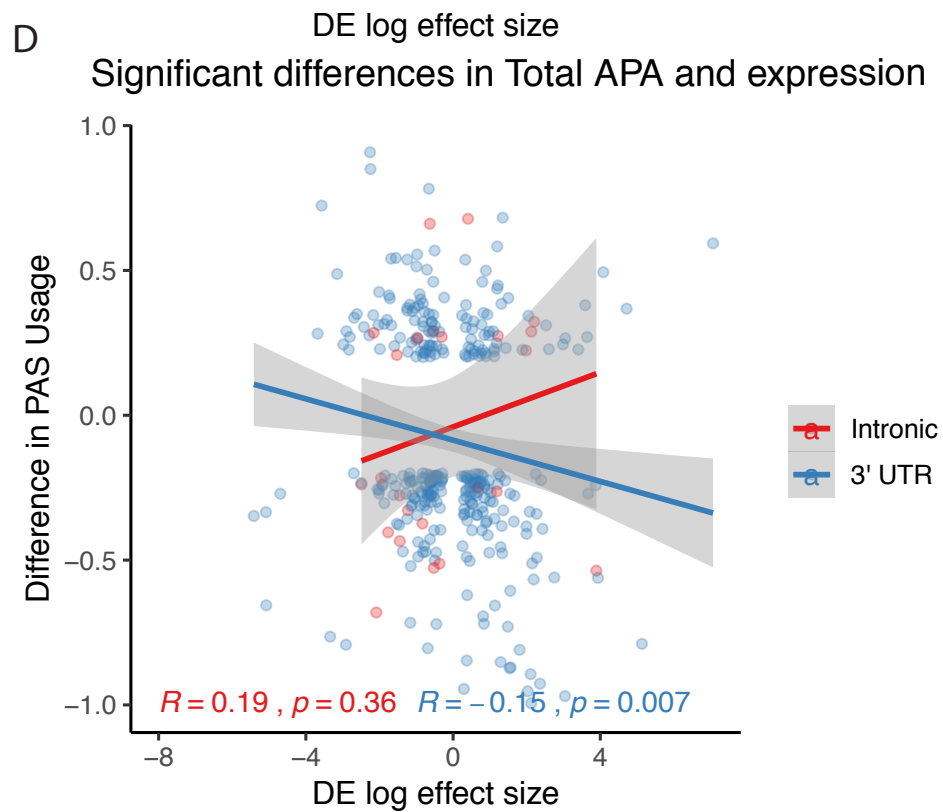

Supplement: supp [file elife-62548-supp-v1.zip]

# Simpson Diversity and PAS number

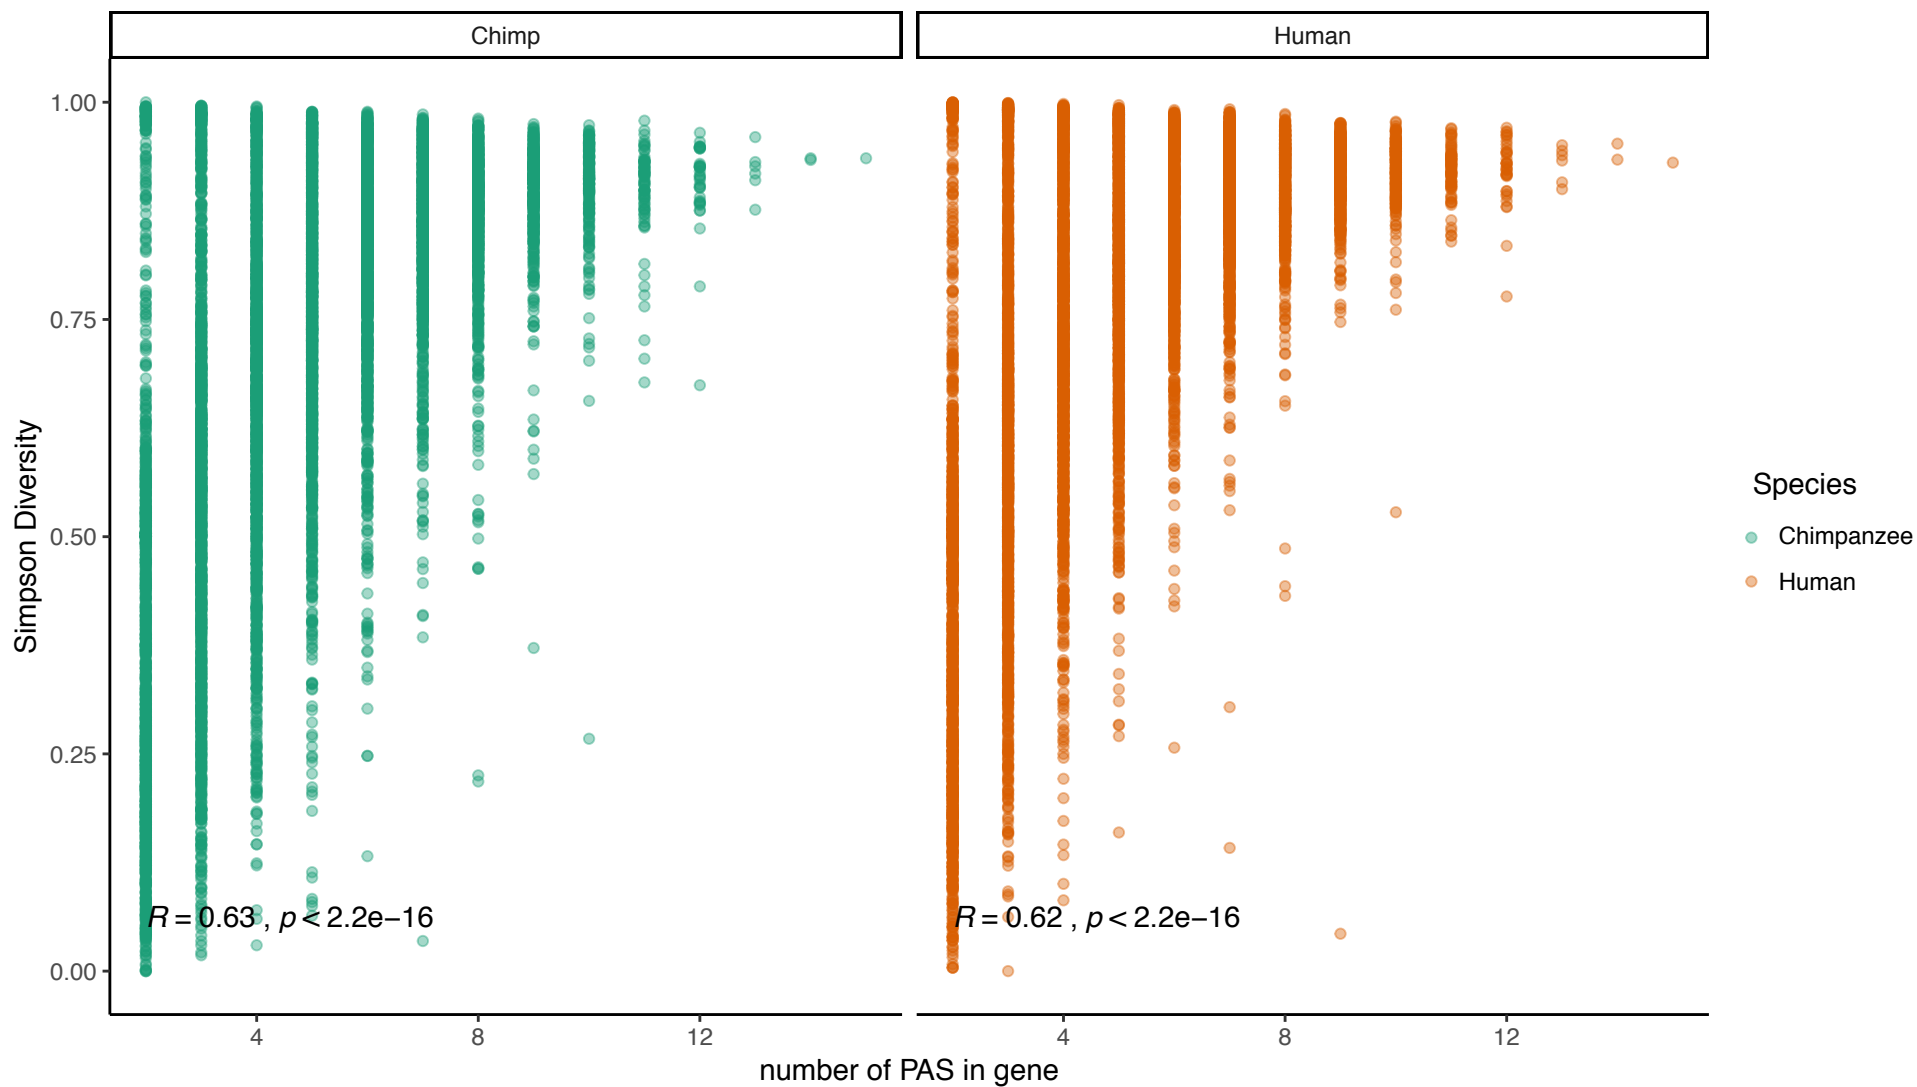

Supplement: supp [file elife-62548-supp-v1.zip]

Usage distribution by Signal and species

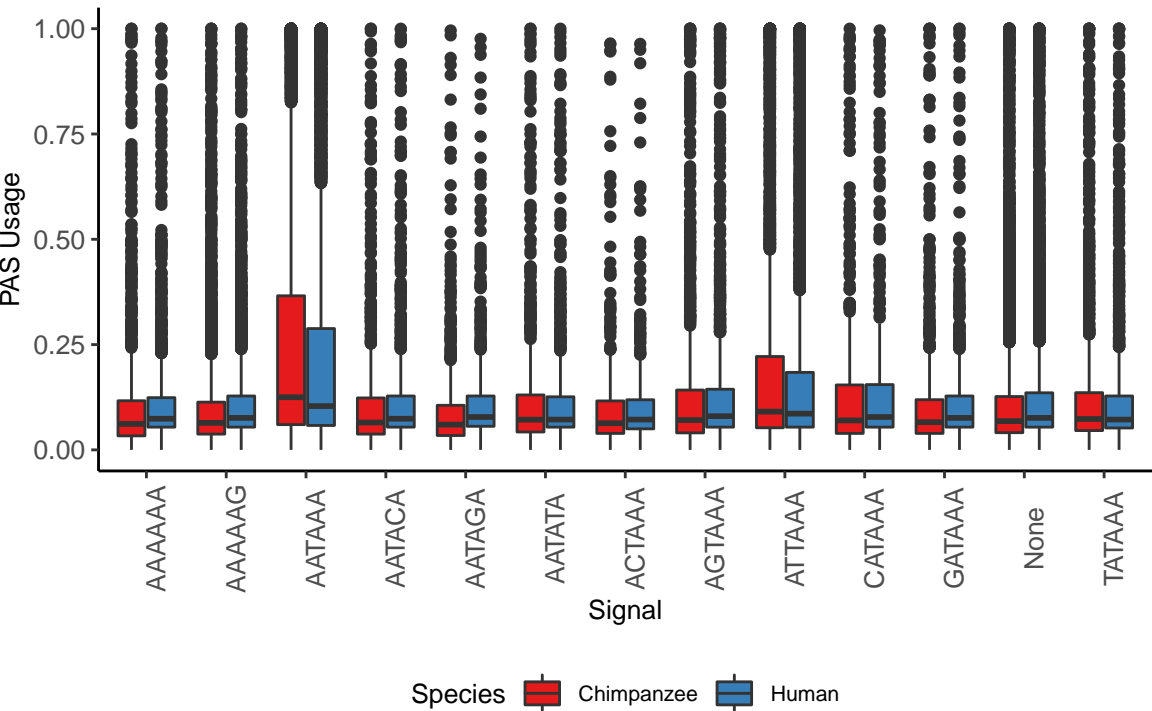

Supplement: supp [file elife-62548-supp-v1.zip]

# PAS are more conserved than surrounding regions

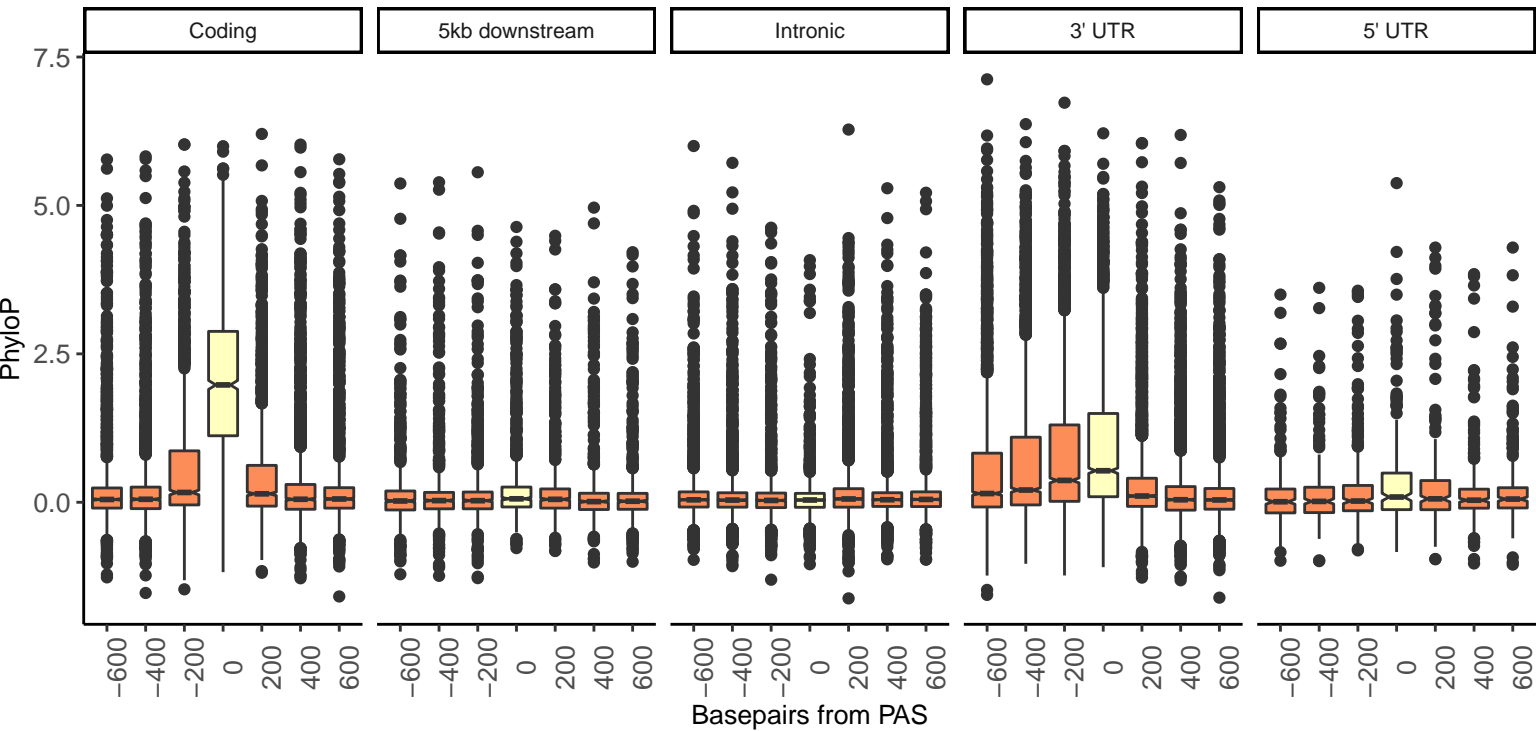

Supplement: supp [file elife-62548-supp-v1.zip]

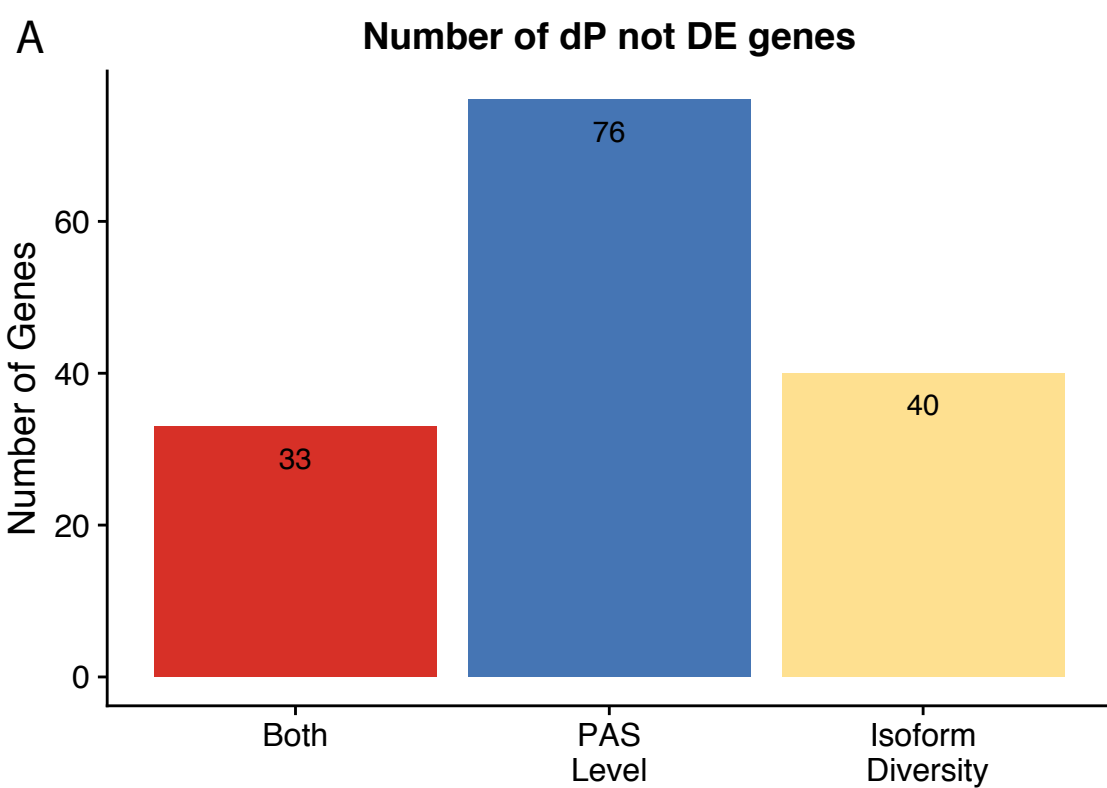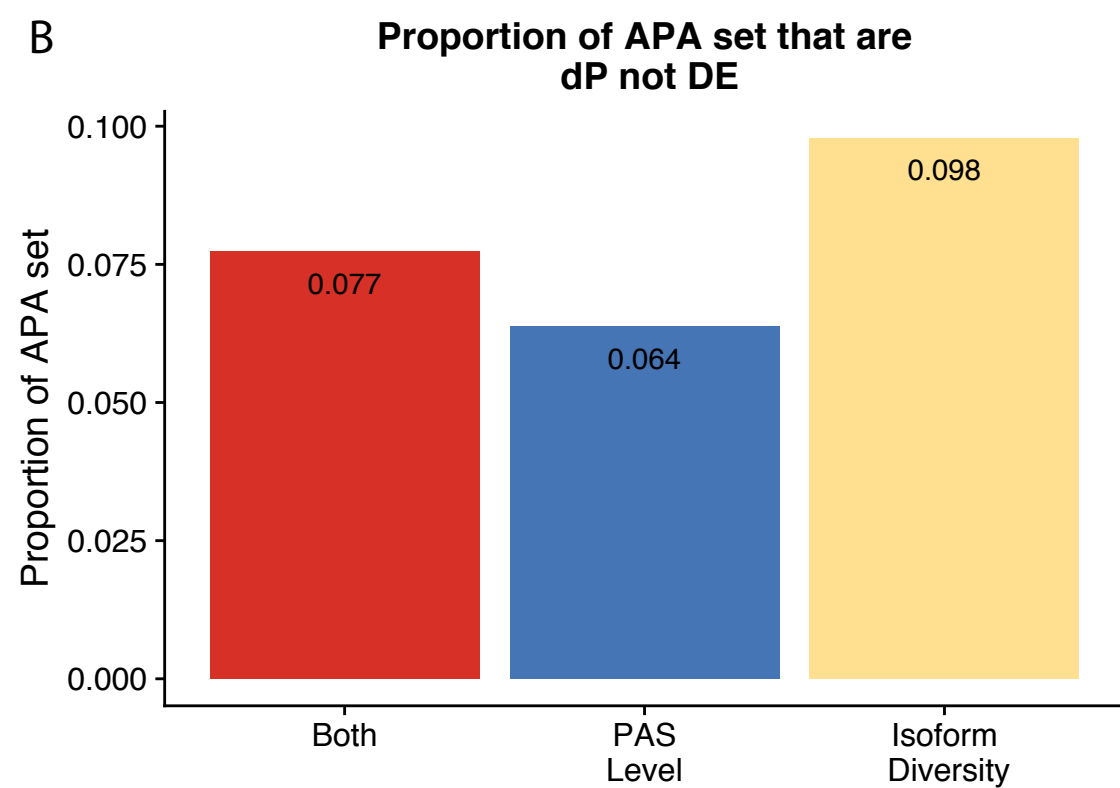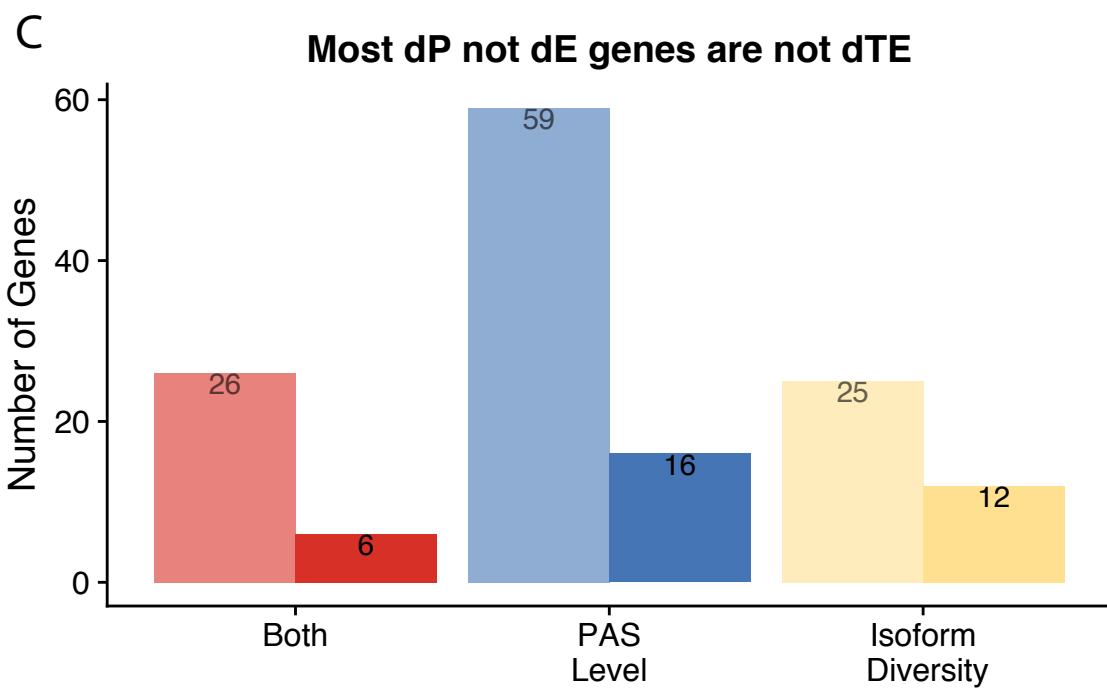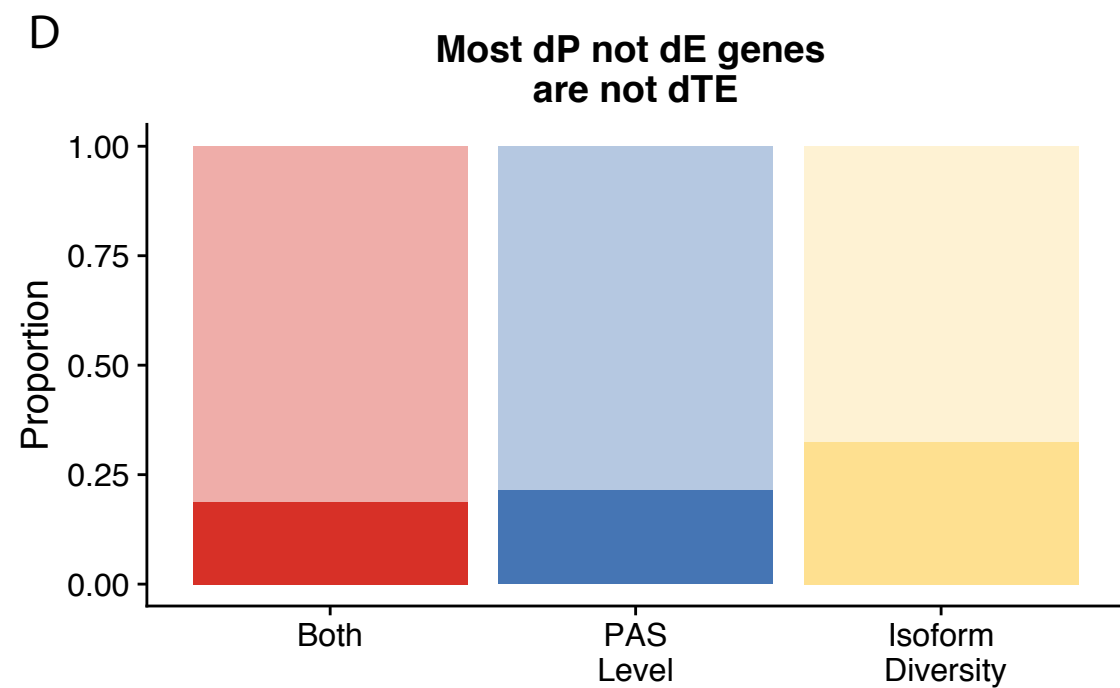

dTE ☐ No ☒ Yes

dTE ☐ No ☒ Yes

Supplement: supp [file elife-62548-supp-v1.zip]

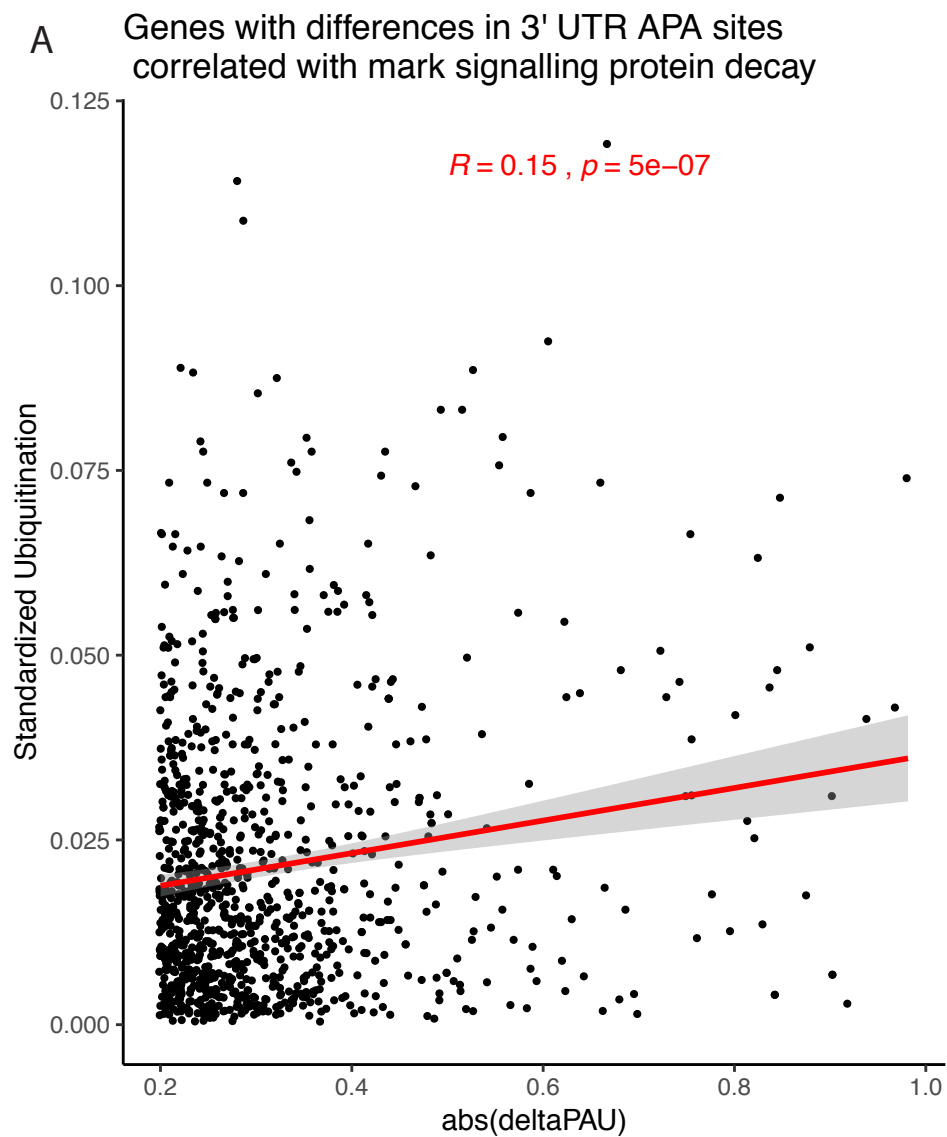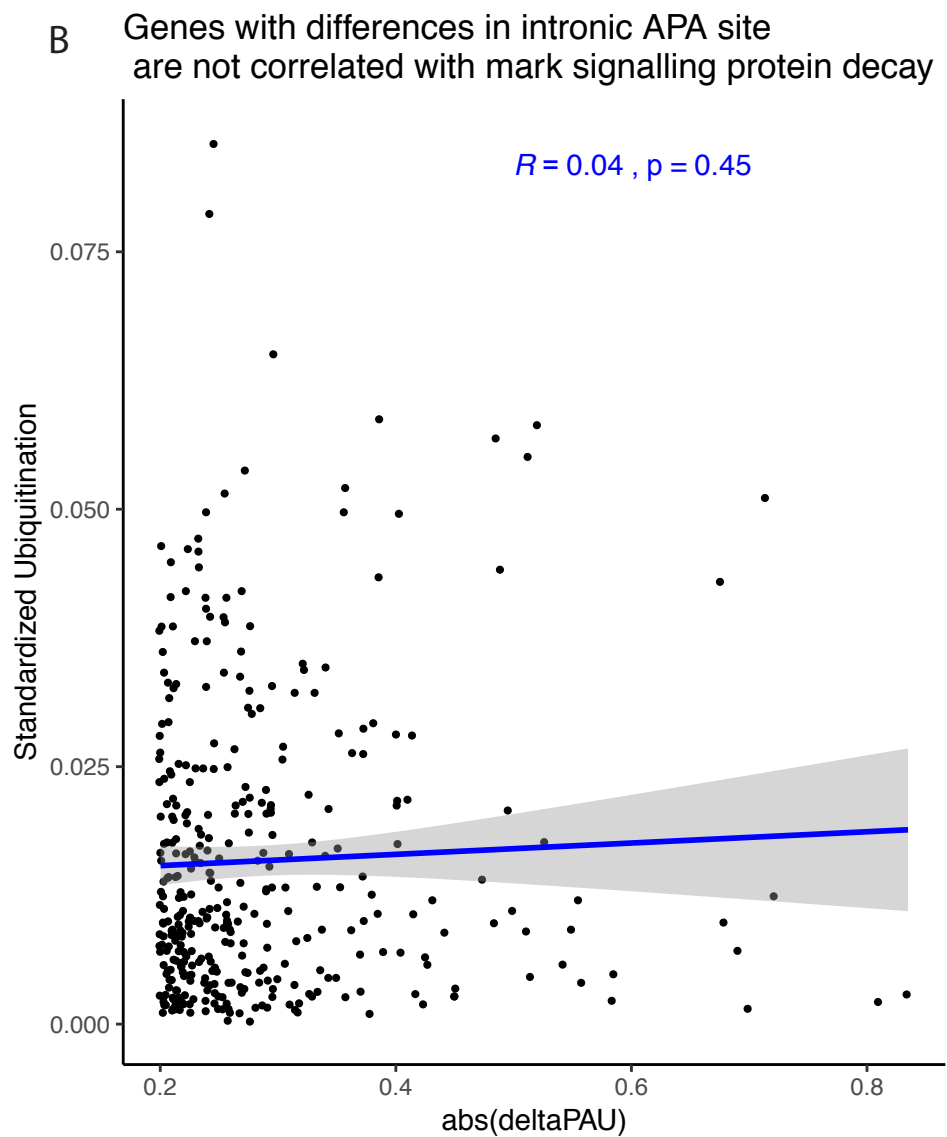

Supplement: supp [file elife-62548-supp-v1.zip]

# Location of differentially used PAS

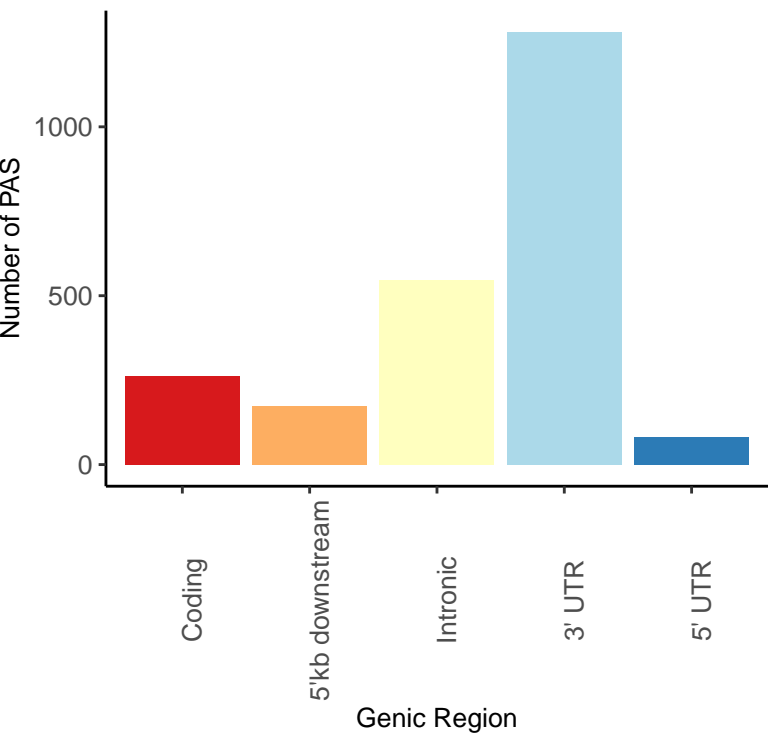

Supplement: supp [file elife-62548-supp-v1.zip]

Of the 10,077 Unlifted PAS

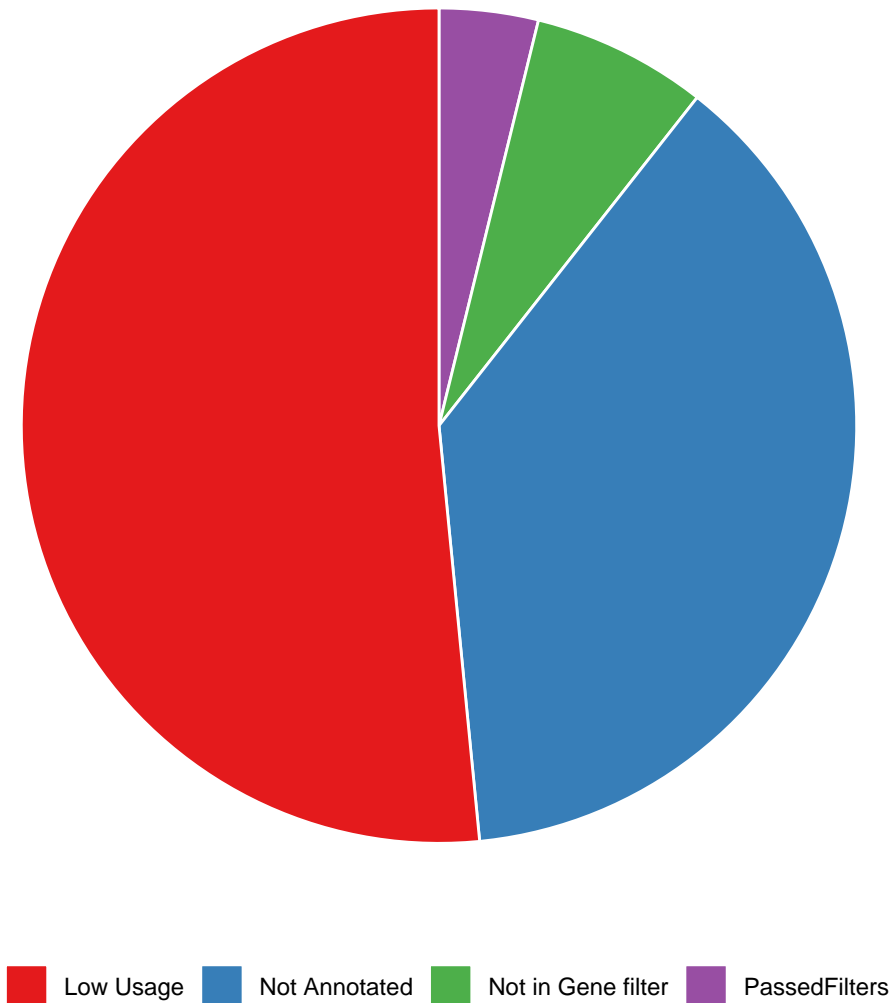

Supplement: supp [file elife-62548-supp-v1.zip]

**A**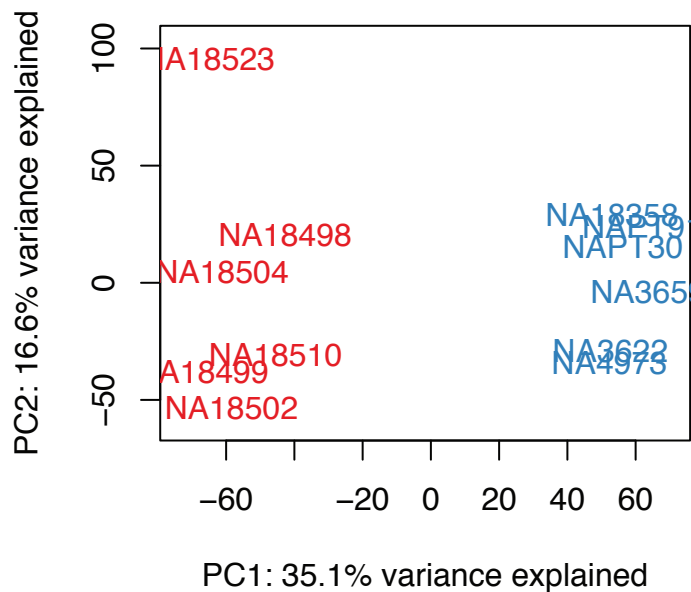**B**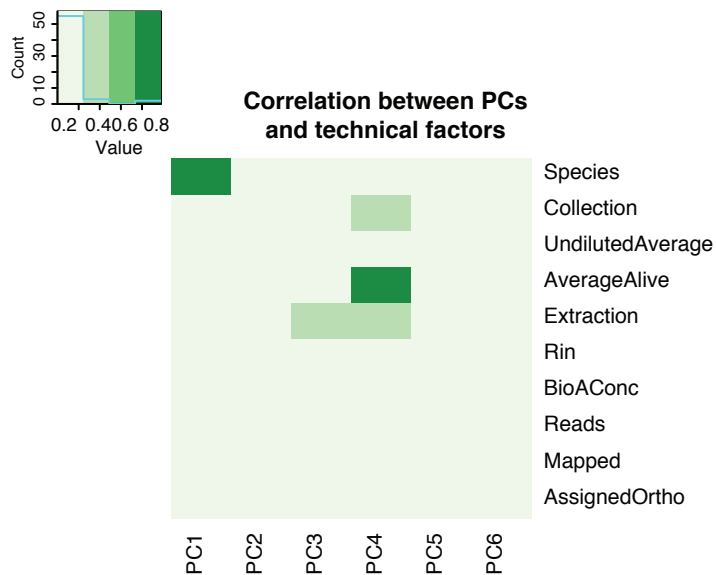**C**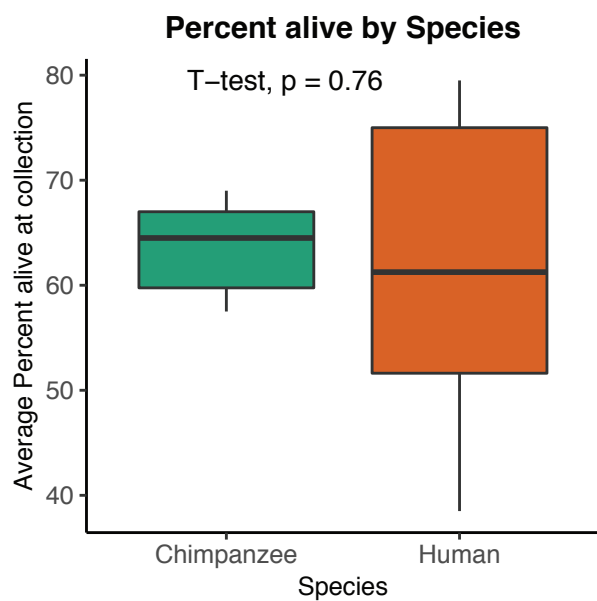**D**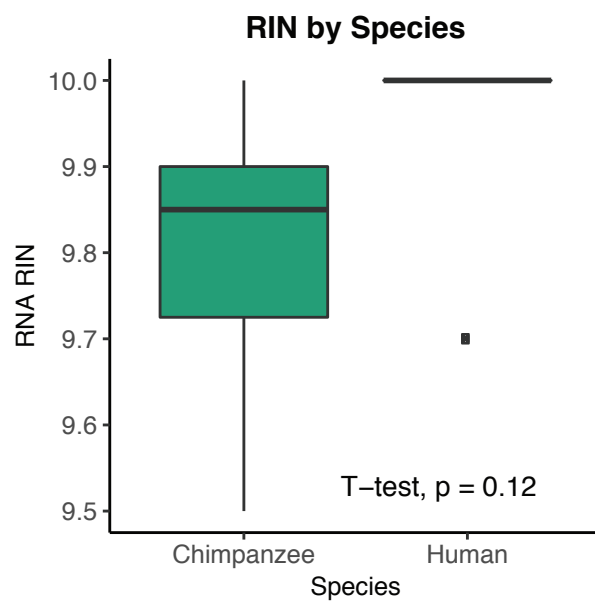**E**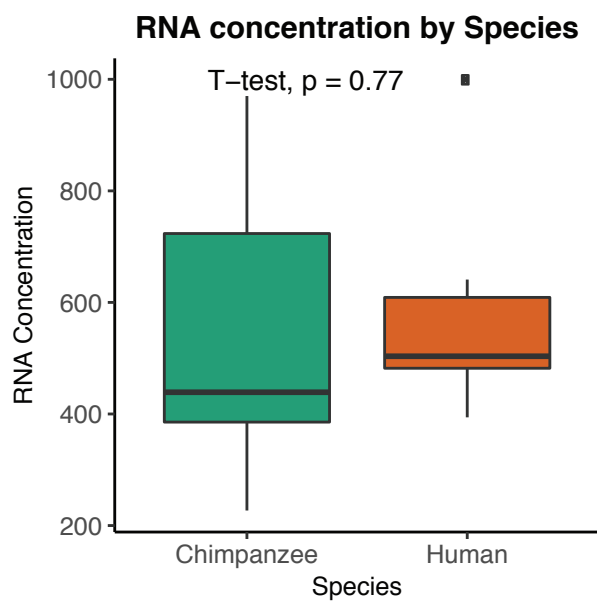**F**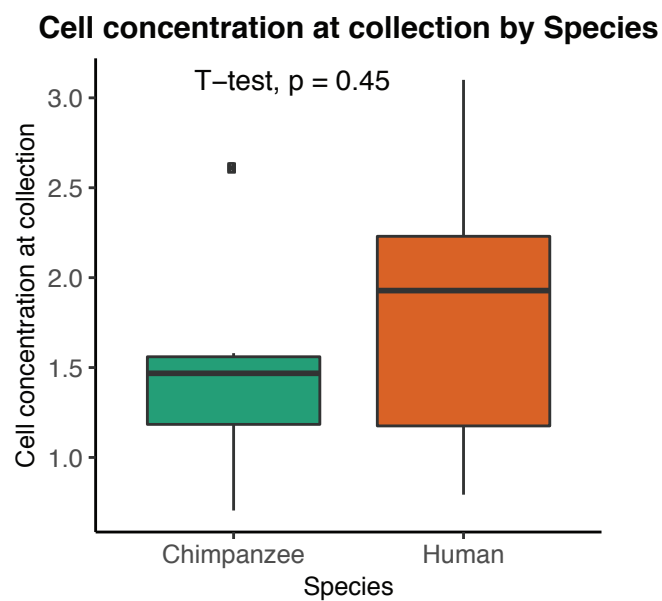

Supplement: supp [file elife-62548-supp-v1.zip]

Correlation between total and nuclear usage  
for PAS over 5% in both fractions

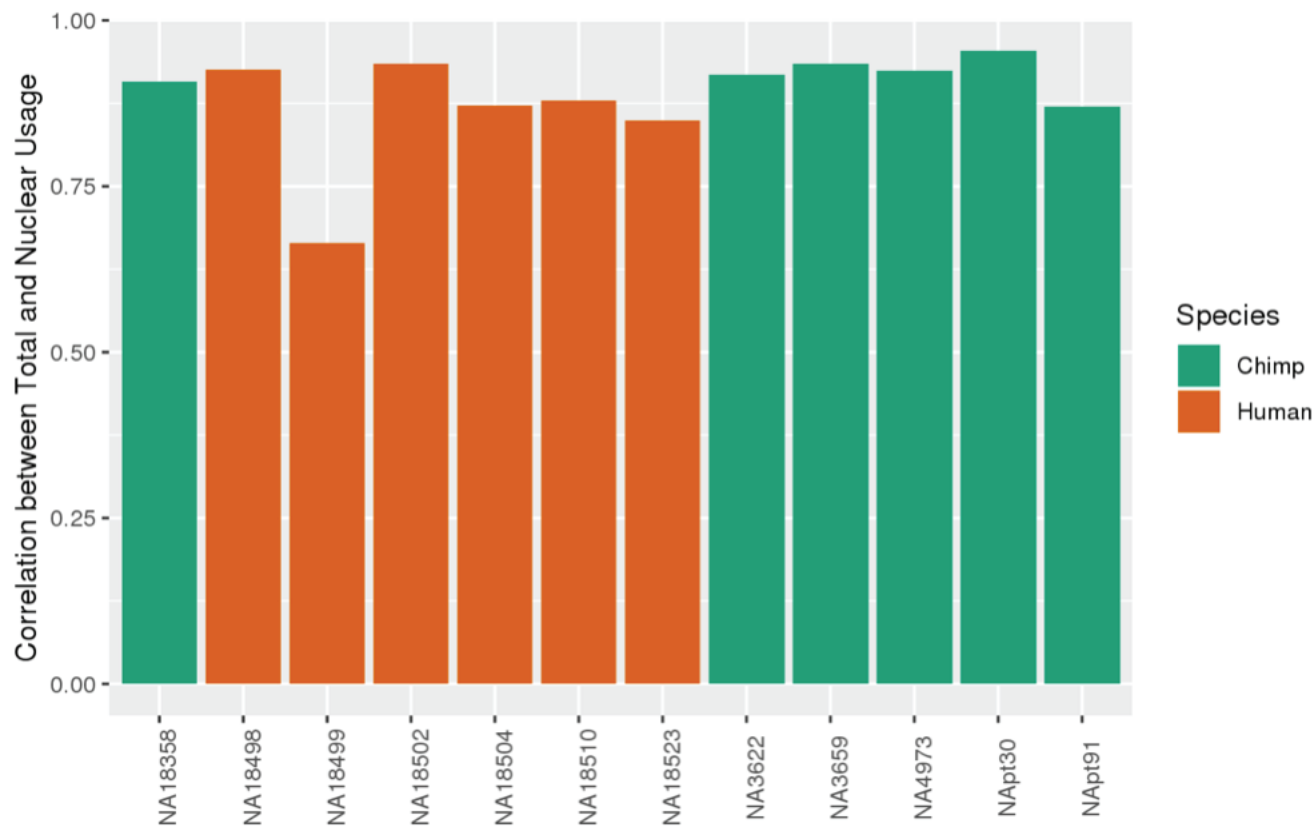

Supplement: supp [file elife-62548-supp-v1.zip]

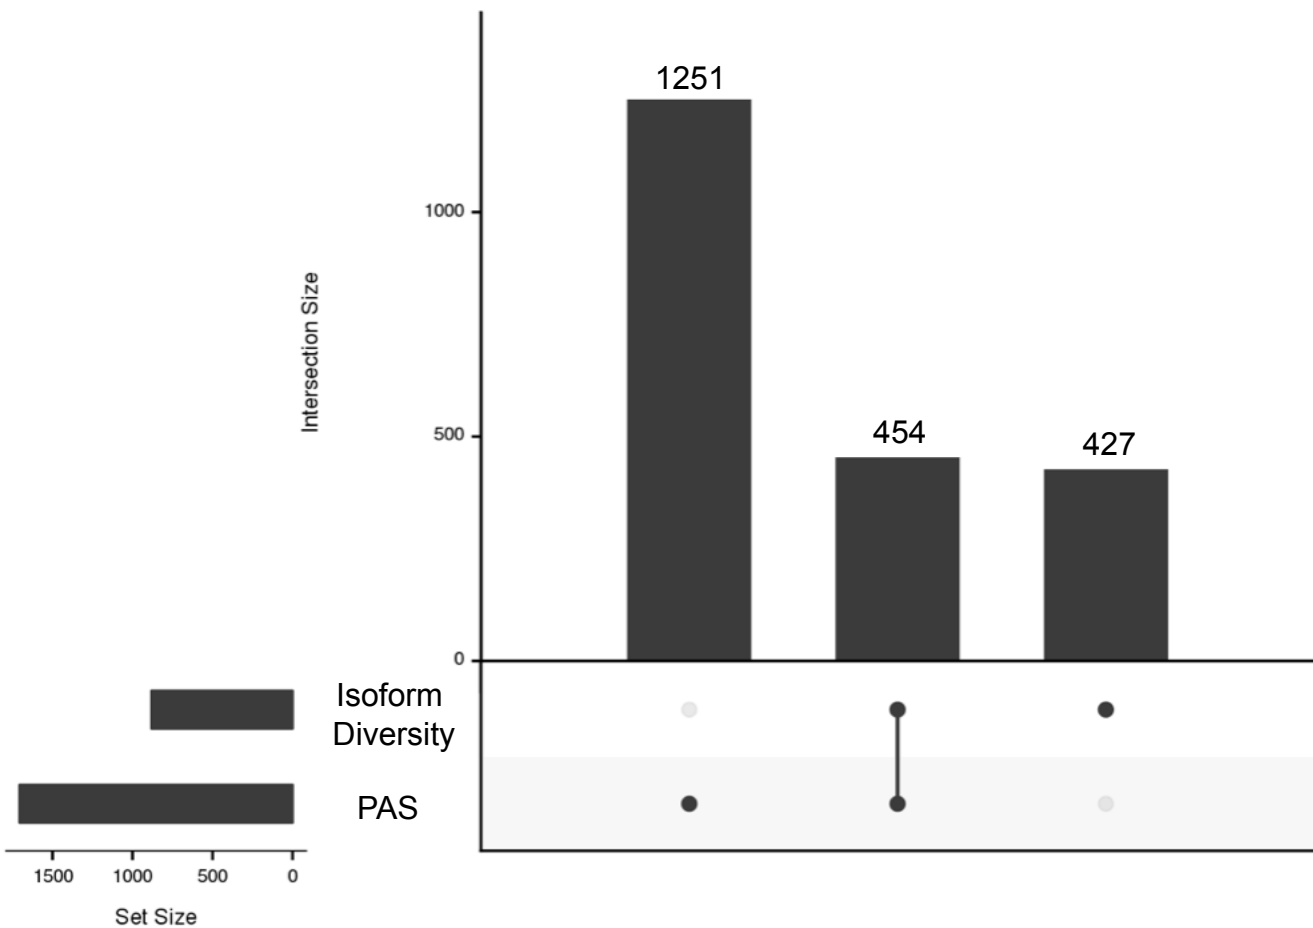

Supplement: supp [file elife-62548-supp-v1.zip]

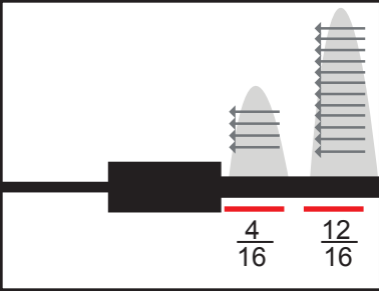

Supplement: supp [file elife-62548-supp-v1.zip]

# Nuclear dAPA overlap with apaQTL Genes

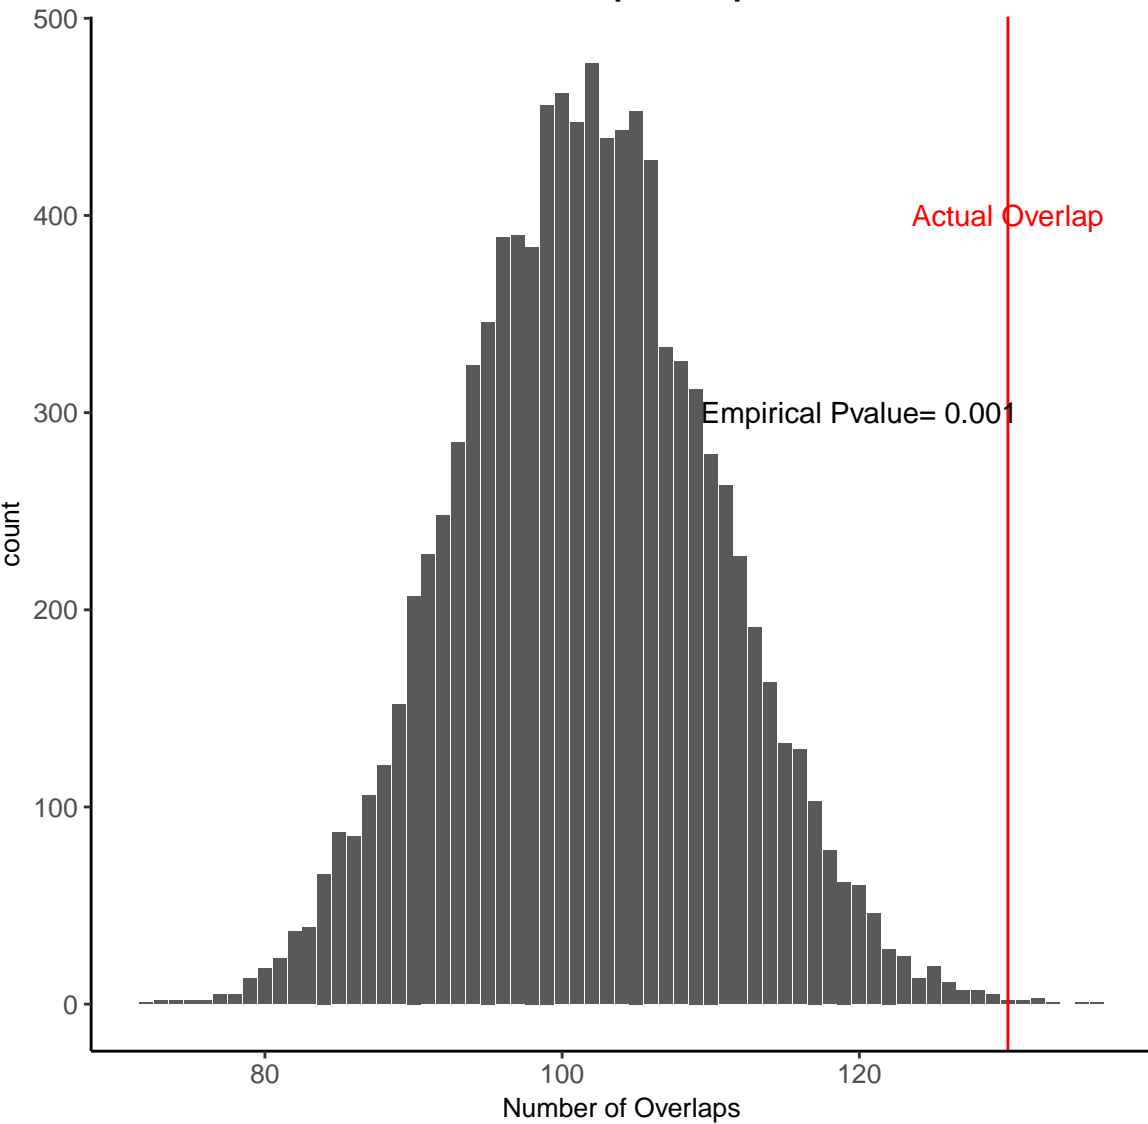

Supplement: supp [file elife-62548-supp-v1.zip]

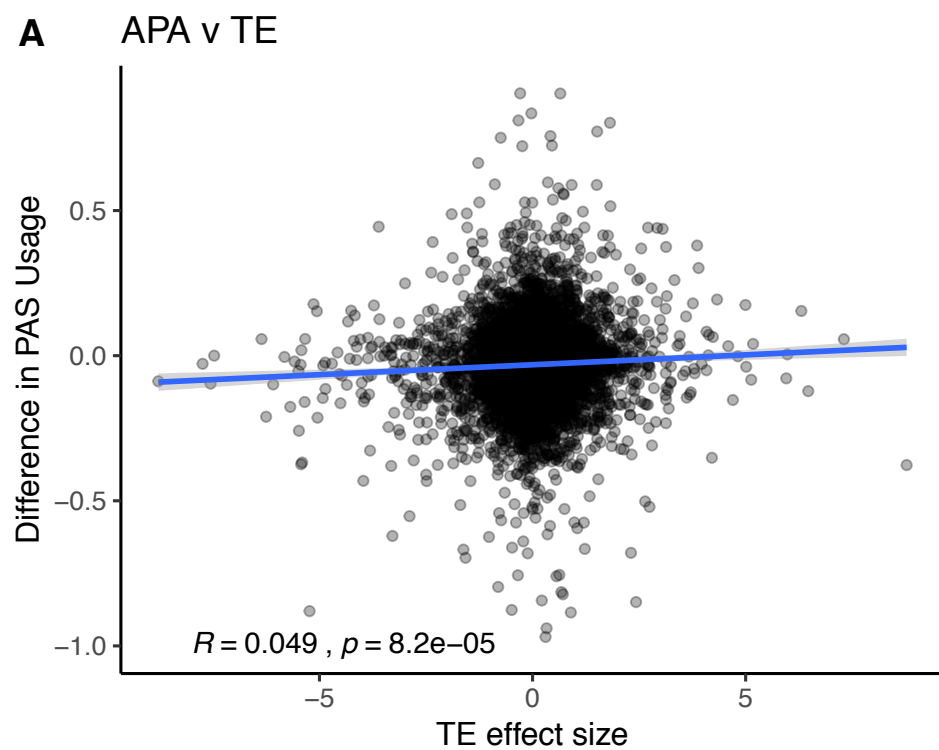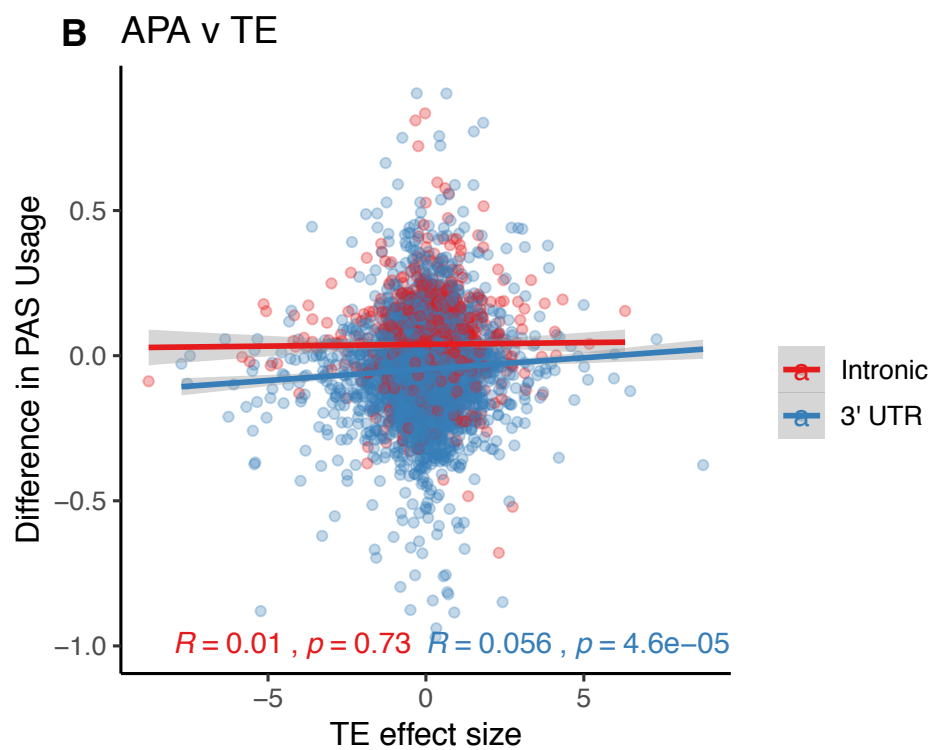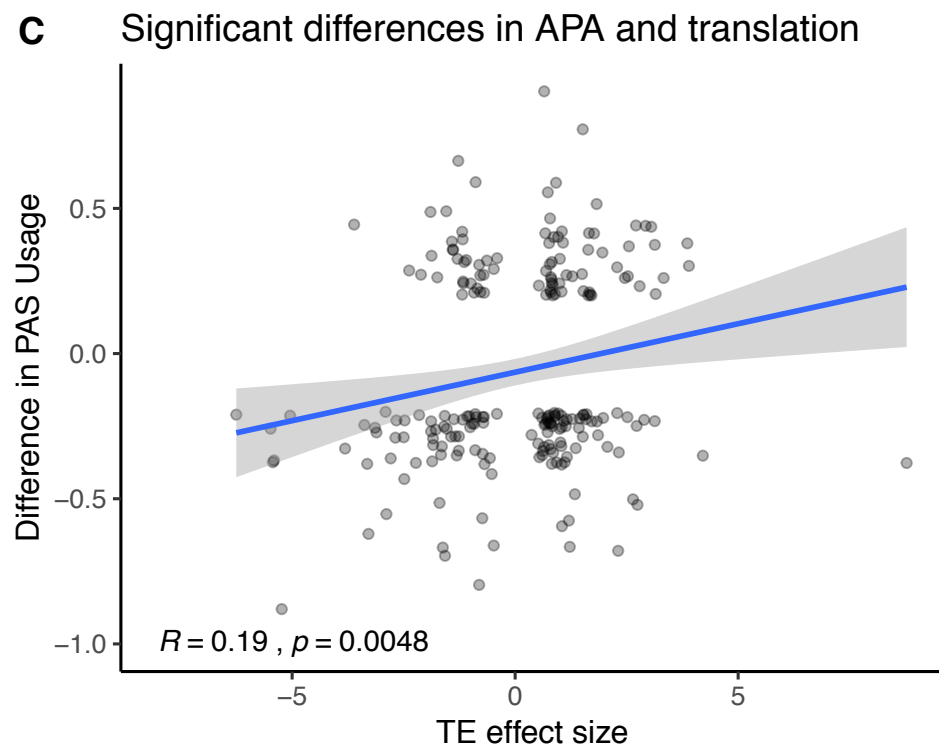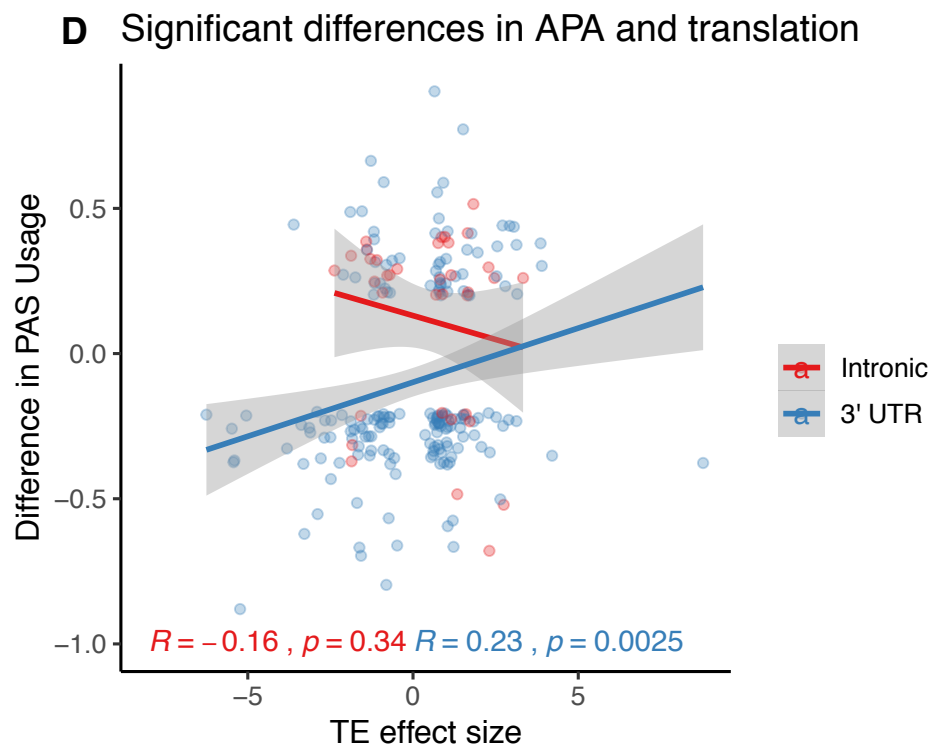

Supplement: supp [file elife-62548-supp-v1.zip]

# Differentially used PAS are more likely to be the first site in orthologous 3' UTRs

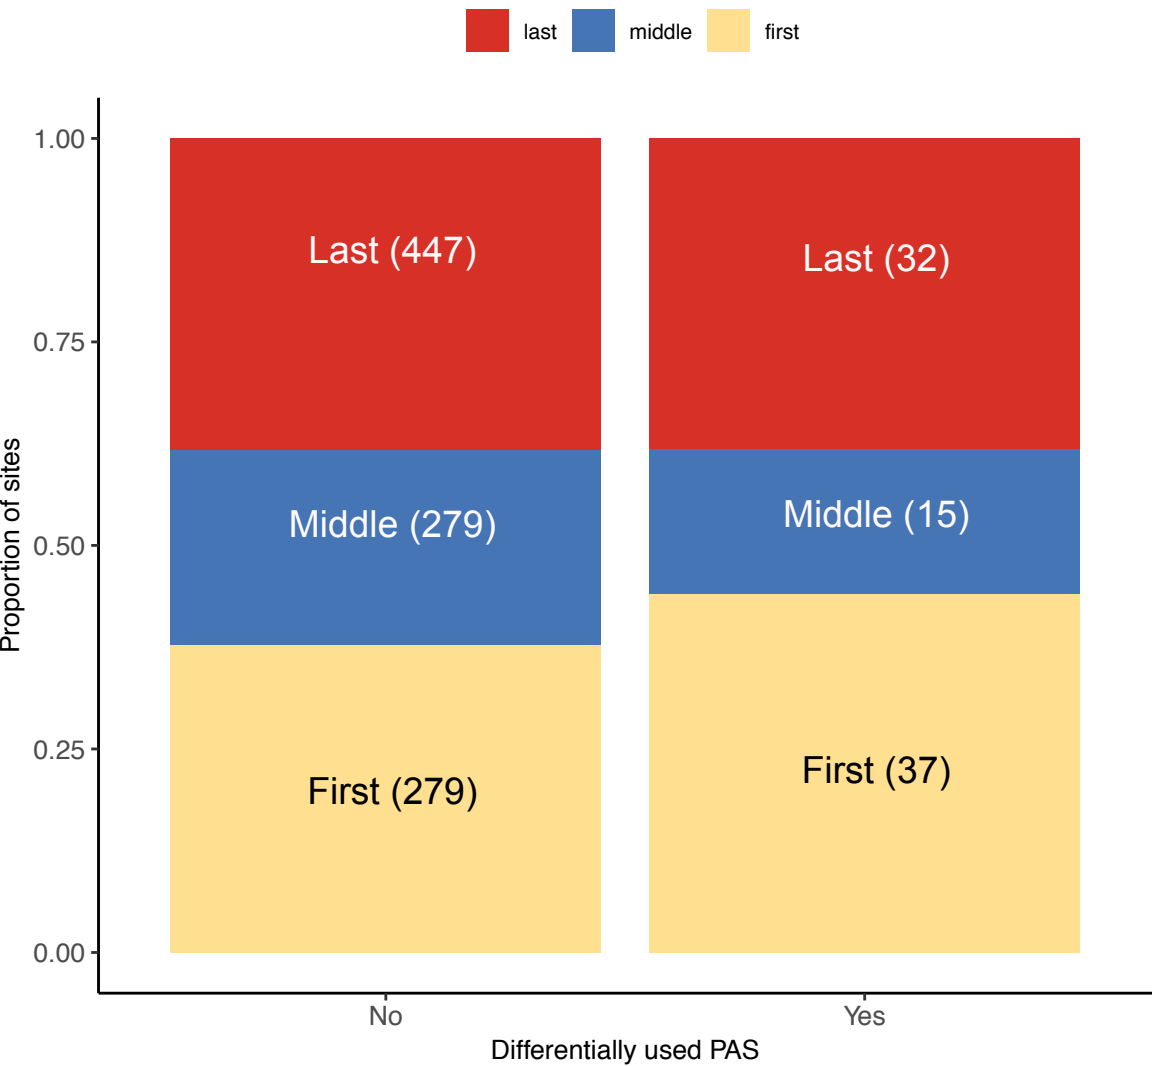

Supplement: supp [file elife-62548-supp-v1.zip]

**A** Chimpanzee Nuclear 3' Seq

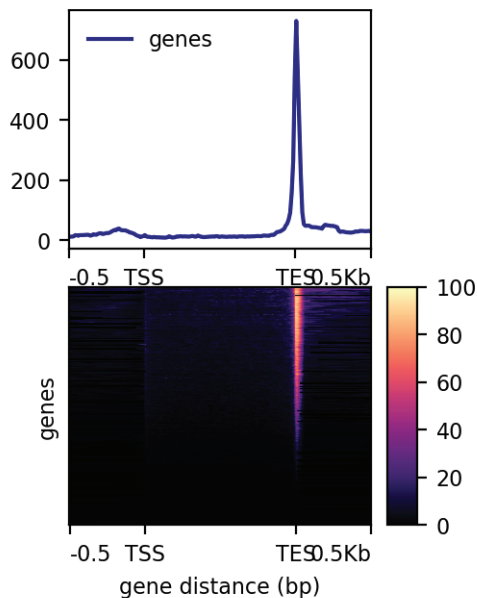

**B** Human Nuclear 3' Seq

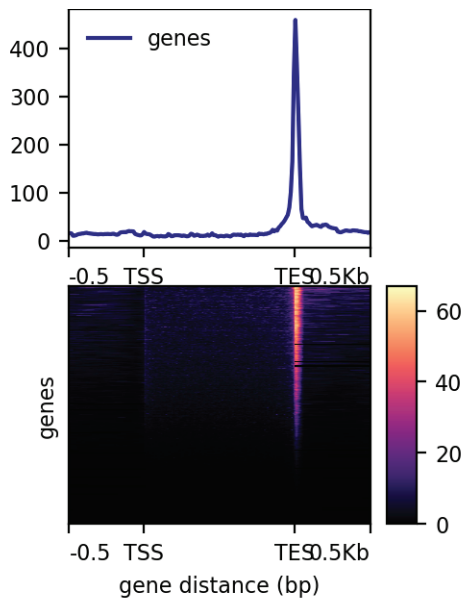

**C** Chimpanzee Nuclear 3' Seq

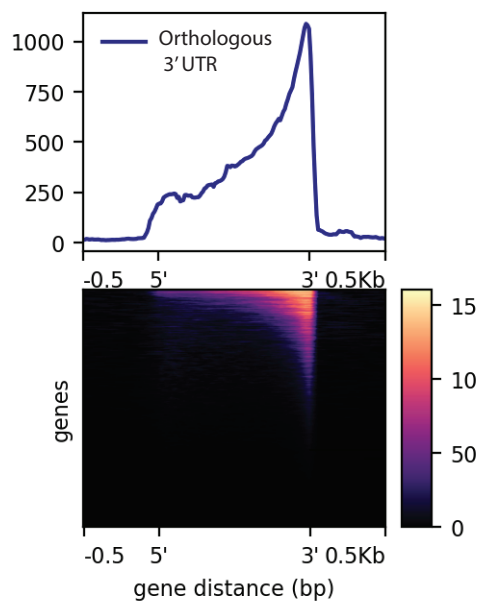

**D** Human Nuclear 3' Seq

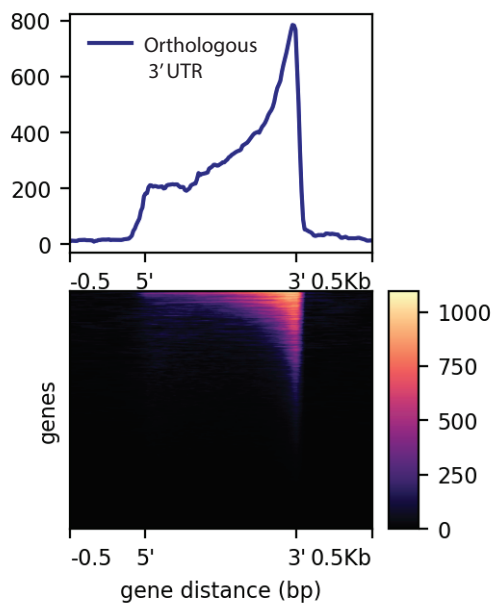

Supplement: supp [file elife-62548-supp-v1.zip]
